1       **The long noncoding RNA *Charme* supervises cardiomyocytes maturation by**  
2               **controlling cell differentiation programs in the developing heart**

3  
4       **Valeria Taliani<sup>1,‡†</sup>, Giulia Buonaiuto<sup>1†</sup>, Fabio Desideri<sup>2</sup>, Adriano Setti<sup>1</sup>, Tiziana Santini<sup>2</sup>, Silvia Galfrè<sup>2</sup>,**  
5       **Carmine Nicoletti<sup>3</sup>, Leonardo Schirone<sup>4</sup>, Davide Mariani<sup>5</sup>, Valentina Valenti<sup>4</sup>, Sebastiano Sciarretta<sup>4</sup>,**  
6       **Emerald Perlas<sup>6</sup>, Antonio Musarò<sup>3</sup>, Irene Bozzoni<sup>1,2</sup>, Monica Ballarino<sup>1</sup>**

7       <sup>1</sup>Dept. of Biology and Biotechnologies “*Charles Darwin*”, Sapienza University of Rome, Rome, Italy;

8       <sup>2</sup>Center for Life Nano- & Neuro-Science of Istituto Italiano di Tecnologia (IIT), 00161, Rome, Italy;

9       <sup>3</sup>DAHFMO-Unit of Histology and Medical Embryology, Laboratory affiliated to Istituto Pasteur Italia-  
10       Fondazione Cenci Bolognetti, Sapienza University of Rome, Rome, Italy;

11       <sup>4</sup>Department of Medical Surgical Sciences and Biotechnologies, Sapienza University of Rome, Latina, Italy;

12       <sup>5</sup>Center for Human Technologies, Istituto Italiano di Tecnologia (IIT), Genova, Italy;

13       <sup>6</sup>EMBL-Rome, Epigenetics and Neurobiology Unit, Monterotondo, Italy.

14

15       *Corresponding author:* Monica Ballarino

16       *e-mail address:* [monica.ballarino@uniroma1.it](mailto:monica.ballarino@uniroma1.it); *phone:* +39 06 49912201

17

18       <sup>‡</sup>Present address: EMBL, Genome Biology Unit, Heidelberg, Germany

19       <sup>†</sup>These authors contributed equally to this work

20

21       **Running Head**

22       *Charme* functions during development

23

24       **Key Words**

25       NcRNA; LncRNA; Development; Muscle; Myogenesis; Cardiomyogenesis; Heart

26

27       **ABSTRACT**

28 Long noncoding RNAs (lncRNAs) are emerging as critical regulators of heart physiology and disease,  
29 although the studies unveiling their modes-of-action are still scarce and limited to few examples. We  
30 recently identified *pCharme*, a chromatin-associated lncRNA whose functional knockout in mice  
31 results in defective myogenesis and morphological remodelling of the cardiac muscle. By combining  
32 Cap-Analysis OF Gene Expression (CAGE) with single-cell (sc)RNA sequencing and whole-mount  
33 *in situ* hybridization analyses, here we have profiled *pCharme* levels and we found it expressed in  
34 cardiomyocytes since the first steps of cardiomyogenesis. At this early stage, *pCharme* is crucial to  
35 seed the formation of specific RNA-enriched nuclear condensates containing MATR3, its known  
36 protein interactor, as well as important regulators of cardiac development. Perturbation of this  
37 mechanism by *in vivo pCharme* ablation results in myocardium compaction and ventricular hypo-  
38 trabeculation due to a delayed maturation of cardiomyocytes. The identification of novel genes  
39 controlling cardiac morphology is crucially important, as in human's congenital defects in  
40 myocardium compaction are clinically relevant and predispose patients to major complications. Our  
41 studies *in vivo* offer unique insights into cardiac muscle maturation and bear relevance to *Charme*  
42 locus for future theranostic applications.

43

## 44 INTRODUCTION

45 In all vertebrates, heart development occurs through a cascade of events in which a subtle equilibrium  
46 between proliferation, migration, and differentiation ultimately leads cardiac precursor cells to mature  
47 into all the major cell types ([Bruneau 2013](#); [Moorman and Christoffels 2003](#)). At the molecular level,  
48 the execution of the developmental program is governed by the dynamic interplay of several cardiac  
49 regulators, whose expression and functions are coordinated in time and space. Alteration of this  
50 process results in abnormal cardiac morphogenesis and other congenital heart defects that in humans  
51 represent the most common types of birth defects and cause of infant death ([Zimmerman et al., 2020](#);  
52 [Srivastava, 2006](#); [Center for Disease Control and Prevention, 2020](#)). Mutations of transcription

53 factors and protein co-factors have emerged as causative of a broad spectrum of heart malformations,  
54 although only 15-20% of all congenital heart defects are associated to known genetic conditions  
55 ([Morton et al., 2022](#); [Kodo et al., 2009](#); [Bouveret et al., 2015](#); [Ang et al., 2016](#)). The need to find  
56 more targets for diagnosis and therapy has therefore evoked interest in new categories of disease-  
57 causing genes, whose discovery has been accelerated by impressive advancements in genomics. In  
58 this direction, improvements in next-generation sequencing have revolutionized many areas of  
59 biological research, including cardiology, by giving greater awareness of the noncoding (nc)RNA  
60 variety and potential ([Mattick et al., 2004](#); [Cipriano et al., 2018](#)). Our understanding of the staggering  
61 abundance of ncRNAs culminated with the discovery of long ncRNAs (lncRNAs) ([Rinn and Chang](#)  
62 [2012](#); [Ulitsky and Bartel 2013](#); [Yao et al., 2019](#)). These RNAs form a heterogeneous class of non-  
63 protein coding transcripts, longer than 200 nucleotides, participating in many physiological (i.e. cell  
64 stemness, differentiation or tissue development) and pathological (i.e. cancer, inflammation,  
65 cardiovascular or neurodegeneration diseases) processes ([Azad et al., 2021](#); [Hu et al., 2018](#); [Riva et](#)  
66 [al., 2016](#)). In the heart, several biologically relevant lncRNAs have been identified, with functions  
67 related to aging ([Zhao et al., 2020](#); [Ghafouri-Fard et al., 2021](#)), regeneration ([Pagano et al., 2020](#);  
68 [Wang et al., 2021](#)) and development ([Sabour et al., 2018](#); [Han et al., 2019](#); [García-Padilla et al.,](#)  
69 [2018](#); [Pinheiro et al., 2021](#)). As of now, there are several examples of lncRNAs that have been proven  
70 to exert important functions for cardiac cells development *in vitro* ([Klattenhoff et al., 2013](#); [Ounzain](#)  
71 [et al., 2015](#); [Kim et al., 2021](#)); however, when it comes to understanding their role in *in vivo* heart  
72 development, the knowledge currently available is fragmentary and comprised of very few instances  
73 ([Grote et al. 2013](#); [Anderson et al., 2016](#); [Ritter et al., 2019](#)). Nevertheless, the importance of these  
74 class of transcripts for adult heart homeostasis has been described in both mouse and human systems  
75 by linking the aberrant expression of specific lncRNAs to heart anomalies ([Han et al., 2014](#); [Wang et](#)  
76 [al., 2016](#); [Ballarino et al., 2018](#); [Scheuermann et al., 2013](#); [Ponnusamy et al., 2019](#); [Anderson et al.,](#)  
77 [2021](#)). Along this line, in 2015 we identified a new collection of muscle-specific lncRNAs ([Ballarino](#)

78 [et al., 2015](#)) and focused our attention on *Charme* (*Chromatin architect of muscle expression*), a  
79 mammalian conserved lncRNA gene, whose loss-of-function in mice causes progressive myopathy  
80 and congenital heart remodelling ([Ballarino et al., 2018](#)). Here, we extend the functional  
81 characterization of *Charme* to a developmental window and assign an embryonic origin to the cardiac  
82 defects produced by its knockout in mouse. By using whole-tissue imaging approaches we  
83 successfully visualize the early activation of *Charme* gene in the heart, with the functional *pCharme*  
84 isoform being highly expressed in foetal tissues and progressively dropping down after birth. To gain  
85 a deeper understanding of the *pCharme* cell type-specific expression, we mined the available single-  
86 cell (sc)RNA sequencing datasets of mouse embryonal hearts and found its expression to be restricted  
87 to cardiomyocytes (CM). In line with this specific localization, high-throughput transcriptomic  
88 analyses combined with the phenotypic characterization of WT and *Charme*<sup>KO</sup> developing hearts  
89 highlight a critical role of the lncRNA for CM maturation and for the formation of trabeculated  
90 myocardium during development. Furthermore, high-throughput sequencing of RNA isolated from  
91 embryonal cardiac biopsies upon cross-linking and immunoprecipitation (CLIP) of MATR3, a  
92 nuclear *pCharme* interactor ([Desideri et al., 2020](#)), revealed the existence of a specific RNA-rich  
93 condensate containing *pCharme* as well as important regulators of embryo development, cardiac  
94 function, and morphogenesis. In line with the functional importance of the *pCharme*/MATR3  
95 interaction in developing cardiomyocytes, MATR3 depletion in mouse-derived cardiac primary cells  
96 leads to the down-regulation of this class of transcripts, suggesting an active crosstalk between  
97 MATR3 and *pCharme* regulatory pathways.

98 Understanding the basics of cardiac development from the lncRNA point-of-view is of interest not  
99 only for unravelling novel RNA-mediated circuitries but also for improving treatment options aimed  
100 to enhance cardiomyogenic differentiation. Indeed, despite the recent advancements in generating  
101 cardiomyocytes from pluripotent stem cells through tissue engineering-based methods, most  
102 protocols produce immature cells, which lack many attributes of adult cardiomyocytes ([Uosaki et al.,](#)

103 [2015](#)). Consequently, the cells generated cannot be used for efficient drug screening, modelling of  
104 adult-onset disease, or as a source for cell replacement therapy. Here, we discovered a new non-  
105 coding regulator of cardiac maturation and characterized the molecular interactome participating in  
106 this process *in vivo*. This research will both advance our understanding of heart physiology and  
107 disease and will also serve as a foundation for future studies in human diagnostics and therapeutics.

108

## 109 **RESULTS**

### 110 ***Charme* locus expression in developing mouse embryos and cardiomyocytes.**

111 Our earlier studies revealed the occurrence of muscle hyperplasia and cardiac remodelling upon the  
112 CRISPR/Cas9-mediated *Charme* loss-of-function in mice ([Ballarino et al., 2018](#); [Desideri et al.,](#)  
113 [2020](#)). Intriguingly, the morphological malformations were clearly displayed in both adult and  
114 neonatal mice, which strongly suggests possible roles for the lncRNA during embryogenesis. With  
115 the purpose to trace back the developmental origins of *Charme* functions, we started by analysing the  
116 whole collection of FANTOM5 mouse promoterome data to quantify transcription initiation events  
117 captured by CAGE-seq across the lncRNA locus ([Noguchi et al., 2017](#)). In addition to its cardiac-  
118 restricted expression (**Figure 1A**, left and middle panels; **Table S1**), this profiling revealed a marked  
119 transcription of the locus at the early stages of cardiac specification, with the highest levels of  
120 expression reached at E14-E15 days (**Figure 1A**, right; **Table S1**). We then evaluated the expression  
121 of the two splice variants produced by the locus, *pCharme* and *mCharme*, by using primers for their  
122 specific amplification in embryonal (E15.5) and postnatal (day 2, PN) hearts. RT-qPCR analysis  
123 confirmed the CAGE output, as both the isoforms are more expressed at the embryonic than postnatal  
124 stage (**Figure 1B**). More importantly, we found *pCharme* to be 50% more abundant than *mCharme*,  
125 which is particularly intriguing considering the prominent role of this nuclear isoform in skeletal  
126 myogenesis ([Desideri et al., 2020](#)). We then applied an *in-situ* hybridization (ISH) approach for  
127 studying the spatio-temporal profile of *pCharme* expression *in vivo*. These analyses revealed the

128 emergence of *pCharme* already in E8.5 cardiac sections when the heart tube formation initiates  
129 (**Figure 1C**, E8.5). Of note, all the regions of the tubular heart were positive for *pCharme* staining,  
130 including the territories giving rise to the future atria and ventricles (V), though the inflow (IFT) and  
131 outflow tracts (OFT) displayed the highest signals. At later stages of development (**Figure 1C**, E13.5;  
132 **Figure 1-figure supplement 1A**), ISH confirmed the presence of *pCharme* in both cardiac tissues  
133 and somites (S), but also revealed the highest levels of expression in ventricles, while signals from  
134 atria were less prominent. A similar expression pattern was found over intact embryos and prenatal  
135 hearts by whole-mount *in-situ* hybridization (**Figure 1D**, left). It is worthy of mention that specific  
136 *pCharme* signals were detected only in wild-type heart muscles, whereas no signal was appreciated  
137 in *Charme* knockout (*Charme*<sup>KO</sup>) mice (**Figure 1D**, left; **Figure 1-figure supplement 1B**).

138 Publicly available single-cell RNA sequencing (scRNA-seq) datasets from embryonal hearts (E12.5,  
139 [Jackson-Weaver et al., 2020](#)) were processed for studying the expression of *pCharme* across different  
140 cell sub-types. This analysis was necessary because distinct cell subpopulations contribute to the  
141 heart, each one carrying out a specialized function in cardiac development and physiology ([de Soysa](#)  
142 [et al., 2019](#)). We clustered the cardiac subpopulations based on the expression of representative  
143 marker genes (**Figure 1-figure supplement 1C-1E**) as previously described ([Li et al., 2016](#); [Jackson-](#)  
144 [Weaver et al., 2020](#); [Franco et al., 2006](#); [Meilhac et al., 2018](#)). Interestingly, we found that, during  
145 embryonic heart development, *pCharme* RNA was restricted to cardiomyocytes, with an almost  
146 identical expression between atrial (CM-A), ventricular (CM-V) and the other CM clusters (CM-VP,  
147 CM-IVS, CM-OFT) (**Figure 1E**). These results provided an accurate resolution of *pCharme*  
148 expression at the level of individual cell types and offered a valuable input for exploring the possible  
149 integration of the lncRNA into pathways controlling the physiology of cardiomyocytes.

150 In an effort to identify the upstream regulators of *pCharme* expression in cardiomyocytes, we then  
151 performed an *in silico* prediction of *cis*-regulatory elements for transcription factors (TFs) playing a  
152 role in heart development. In accordance with our previous findings ([Ballarino et al., 2015](#)), Jaspar

153 database (<https://jaspar.genereg.net>; [Castro-Mondragon et al., 2022](#)) identified several MyoD  
154 *consensus* sites in the 1kb region upstream of *pCharme* transcriptional start site (TSS, **Figure 1F**).  
155 Although in skeletal muscle cells *pCharme* was found to be regulated by MyoD, this myogenic  
156 regulator is not functional in the heart ([Olson, 1993](#); [Buckingham et al., 2017](#)). Searching for other  
157 cardiac regulators, we found canonical TBX5 binding motifs localized in *pCharme* regulatory regions  
158 (**Figure 1F**). In contrast, no *consensus* site was found for OneCut2, a TF involved in neurogenesis  
159 ([Aydin et al., 2019](#)) and chosen as a negative control. T-Box Transcription Factor 5 (TBX5) is a  
160 member of the T-box family of TFs, known to activate genes associated with cardiomyocyte  
161 maturation in early development, and with cardiac morphogenesis at later stages ([Nadadur et al.,](#)  
162 [2016](#); [Steimle et al., 2017](#)). Recently, TBX5 was found to be crucial for the expression of several  
163 lncRNAs ([Yang et al., 2017](#)), a subset of them being enriched in the chromatin fraction of  
164 cardiomyocytes ([Hall et al., 2021](#)). Inspection of Chromatin Immunoprecipitation (ChIP)-sequencing  
165 (**Figure 1G**) and RNA-seq (**Figure 1H**) profiles from progenitor (CP) and differentiated (CM) murine  
166 cardiomyocytes ([Luna-Zurita et al., 2016](#)) revealed the specific occupancy of TBX5 to highly  
167 conserved spots in *pCharme* promoter, which increases with differentiation in concomitance to  
168 *pCharme* expression. Remarkably, the lncRNA expression consistently decreases upon TBX5  
169 knockout, which points to the relevance of this TF for the transcriptional regulation of *Charme* locus.  
170 Nevertheless, the cooperation with additional factors cannot be excluded, also considering the attitude  
171 of TBX5 to interact, physically and functionally, with several other cardiac regulators ([Akerberg et](#)  
172 [al., 2019](#)).



**Figure 1.**

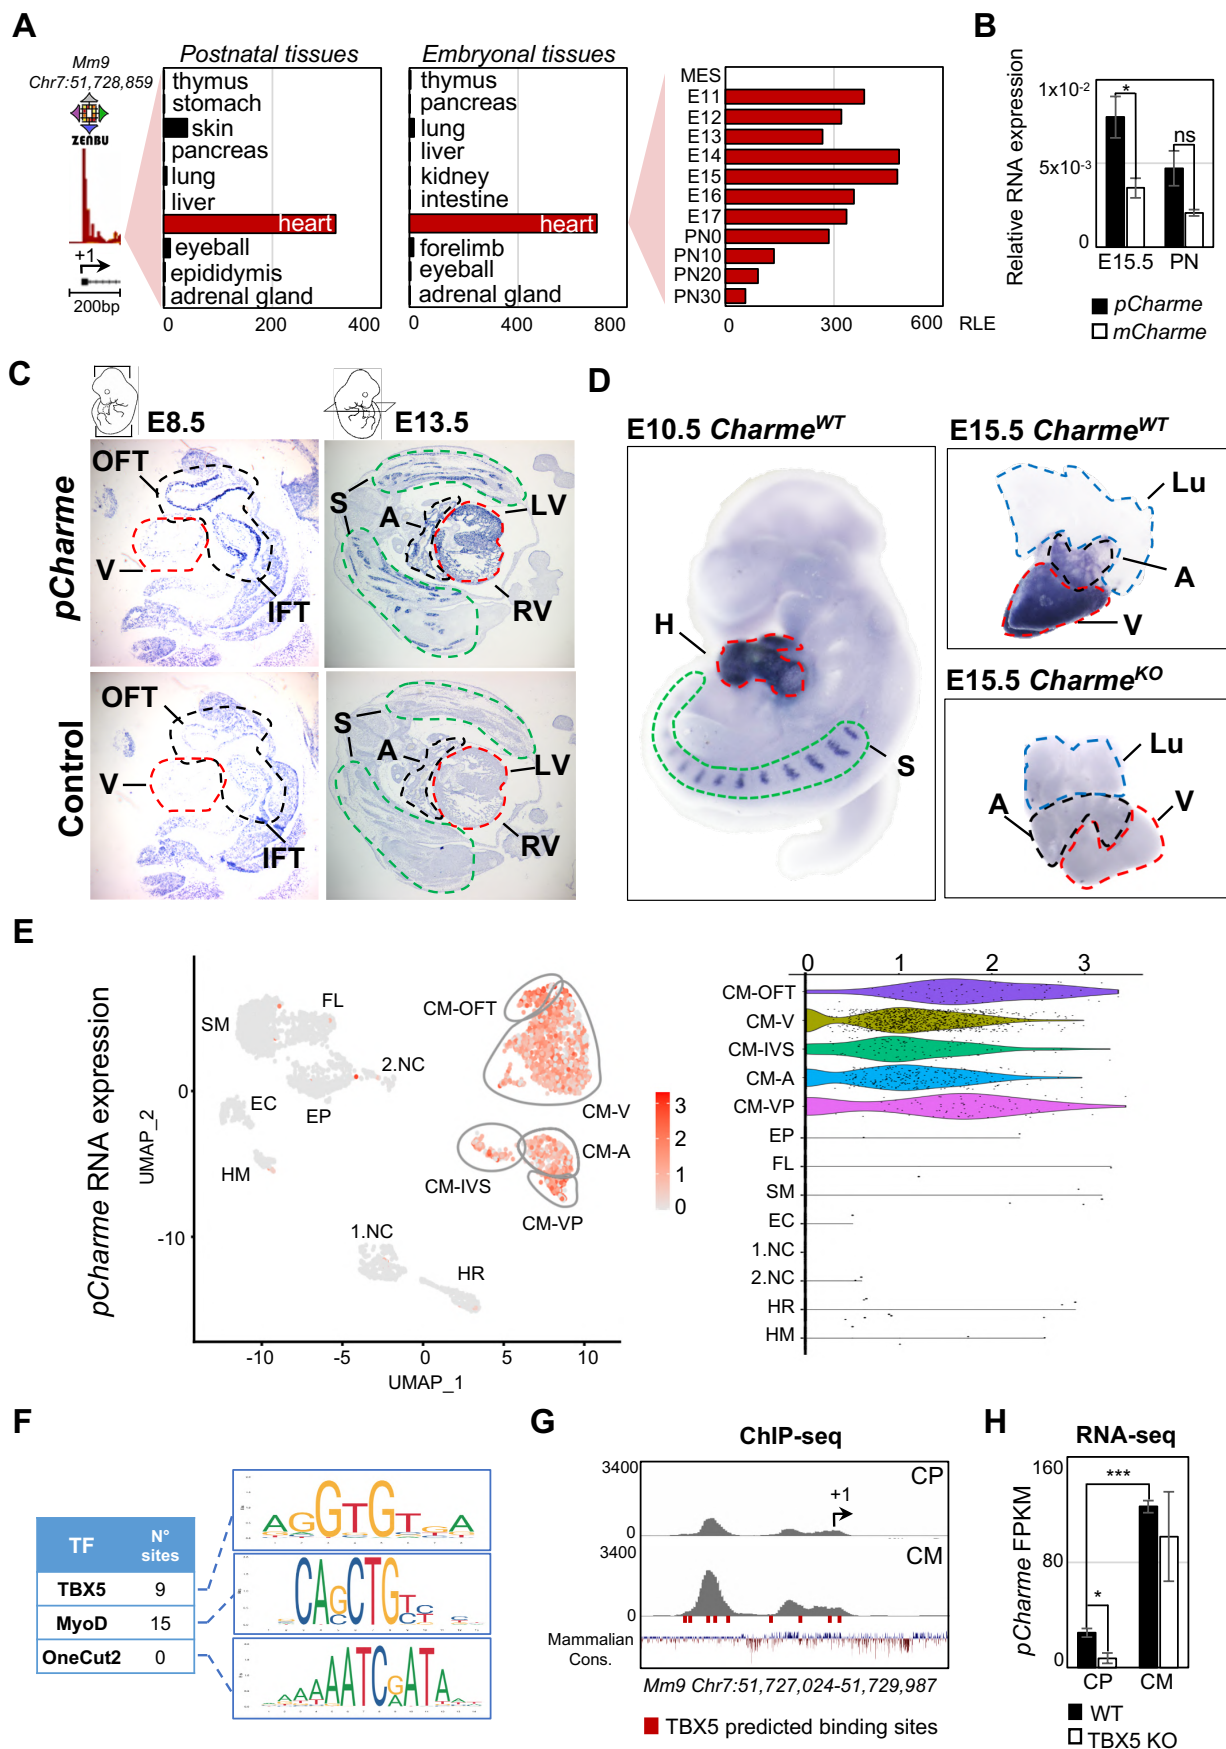



174 **Figure 1. *Charme* locus expression in developing mouse embryos and cardiomyocytes**  
175 **A)** Transcriptional start site (TSS) usage analysis from FANTOM5 CAGE Phase1 and 2  
176 datasets (skeletal muscle not included) on the last update of Zenbu browser  
177 (<https://fantom.gsc.riken.jp/zenbu/>; FANTOM5 Mouse mm9 promoterome)  
178 showing *Charme* locus expression in postnatal and embryonic body districts (left and middle panels)  
179 and during different stages of cardiac development (right panel, E11-PN30). MES=Mesoderm. Bars  
180 represent the Relative Logarithmic Expression (RLE) of the Tag Per Million values  
181 of *Charme* TSS usage in a specific sample. **B)** Quantitative Reverse Transcription PCR (RT-qPCR)  
182 amplification of *pCharme* and *mCharme* isoforms in RNA extract from *Charme*<sup>WT</sup> E15.5 and  
183 postnatal (PN) hearts. Data were normalized to GAPDH mRNA and represent means  $\pm$  SEM of 3  
184 pools. **C)** *In-situ* hybridization (ISH) performed on embryonic cryo-sections using digoxigenin-  
185 labelled RNA antisense (*pCharme*, upper panel) or sense (control, lower panel) probes against  
186 *pCharme*. Representative images from two stages of embryonal development (E8.5 and E13.5) are  
187 shown. OFT: Outflow Tract; IFT: Inflow Tract; V: Ventricle; LV/RV: Left/Right Ventricle; A: Atria;  
188 S: Somites. **D)** Whole-mount *in-situ* hybridization (WISH) performed on *Charme*<sup>WT</sup> intact embryos  
189 (E10.5, left panel) and *Charme*<sup>WT</sup> and *Charme*<sup>KO</sup> hearts at their definitive morphologies (E15.5, right  
190 panels). Signal is specifically detected in heart (H, red line) and somites (S, green line). Lungs (Lu,  
191 blue line) show no signal for *pCharme*. *Charme*<sup>KO</sup> hearts were used as negative control. A: Atria  
192 (black line); LV and RV: Left and Right ventricle. **E)** Left panel: UMAP plot showing *pCharme*  
193 expression in single-cell transcriptomes of embryonal (E12.5) hearts ([Jackson-Weaver et al., 2020](#)).  
194 Right panel: Violin plot of *pCharme* expression in the different clusters (see **Material and Methods**  
195 for details). CM: Cardiomyocytes, CM-A: Atrial-CM, CM-V: Ventricular-CM, ISV: Interventricular  
196 Septum, VP: Venous Pole, OFT: Outflow Tract, NC: Neural Crest cell, EP: Epicardial cells, FL:  
197 Fibroblasts like cells, ED: Endothelial cells, SM: Smooth Muscle cells, HM: Hemopoietic Myeloid  
198 cells, HR: Hemopoietic Red blood cells. **F)** *In silico* analysis of TBX5, MyoD1 and  
199 Onecut2 transcription factors (TF) binding sites using Jaspar 2022 (relative profile score  
200 threshold=80%). MyoD1 and Onecut2 were used as positive and  
201 negative controls, respectively. N° sites =number of consensus motives. **G)** TBX5 ChIP-seq analysis  
202 across *Charme* promoter in murine cardiac-precursors (CP) and mature  
203 cardiomyocytes (CM) (GSE72223, [Luna-Zurita et al., 2016](#)). The genomic coordinates of the  
204 promoter, the *Charme* TSS (+1, black arrow), the TBX5 consensus sites (red lines) and the  
205 mammalian conservation track (Mammalian Cons.) from UCSC genome browser are reported. **H)**  
206 Quantification of *pCharme* expression levels from RNA-seq analysis performed in wild type (WT)  
207 and TBX5 Knock Out (KO) murine CP and CM (SRP062699, [Luna-Zurita et al., 2016](#)). FPKM:  
208 Fragments Per Kilobase of transcript per Million mapped reads. Data information: \*p < 0.05; \*\*\*p <  
209 0.001, unpaired Student's t test.

210

211

212

213

## 214 **Genome-wide profiling of cardiac *Charme*<sup>WT</sup> and *Charme*<sup>KO</sup> transcriptomes**

215 Over the years, we have accumulated strong evidence on the role played by *pCharme* in skeletal  
216 myogenesis ([Ballarino et al., 2018](#); [Desideri et al., 2020](#)). However, important questions still pend on  
217 the role of *pCharme* in cardiomyogenesis, especially concerning the effect of its ablation on the heart  
218 ([Ballarino et al., 2018](#)). As a first step into the identification of the molecular signature underlying  
219 *Charme*-dependent cardiac anomalies, we performed a differential gene expression analysis on  
220 transcriptome profiles from developing WT and *Charme*<sup>KO</sup> hearts (**Figure 2A**; **Figure 2-figure**  
221 **supplement 1A**). This analysis led to the identification of 913 differentially expressed genes (DEGs)  
222 (FDR<0.1, WT vs KO, **Table S2**), 573 of which were up-regulated and 340 down-regulated in  
223 *Charme*<sup>KO</sup> hearts (**Figure 2B**; **Table S2**). Results were confirmed by RT-qPCR analyses performed  
224 from independent biological replicates on gene subsets (**Figure 2C**). A Gene Ontology (GO) term  
225 enrichment study was then applied separately to the up-regulated and down-regulated genes. The  
226 analyses revealed that the up-regulated DEGs were significantly enriched (FDR-values < 1,0E-10) in  
227 cell cycle and cell division GO categories (**Figure 2D**, left panel; **Figure 2-figure supplement 1B**,  
228 upper panel). This result correlates with the increased number of Ki-67<sup>+</sup> mitotic nuclei as quantified  
229 in *Charme*<sup>KO</sup> cardiac tissues as compared to WT (**Figure 2-figure supplement 1C**) and it is also  
230 highly consistent with the phenotype of cardiac hyperplasia previously observed in postnatal and  
231 young *Charme*<sup>KO</sup> hearts (Ballarino et al 2018). Even more interestingly, the down-regulated genes  
232 clustered to more functional and morphogenetic categories, such as anatomical structure  
233 morphogenesis (FDR 5.77E-07) and circulatory system development (FDR 3.1338E-06) (**Figure 2D**,  
234 right panel; **Figure 2-figure supplement 1B**, lower panel). These categories include TFs involved in  
235 pivotal steps of embryo development such as Smad3 ([Dunn et al., 2004](#)) and Notch3 ([MacGrogan et](#)  
236 [al., 2018](#)), and functional components of cardiomyocytes such as Cacna1c, the alpha-1 subunit of a  
237 well-known voltage-dependent calcium channel ([Wang et al., 2018](#)), and the Myosin-18B (Myo18B)  
238 gene, known to regulate cardiac sarcomere organization ([Latham et al., 2020](#)). In line with

239 transcriptomic data, RT-qPCR analyses revealed a similar trend of down-regulation when the  
240 expression of these genes was compared between *Charme*<sup>KO</sup> and wild-type cardiac RNA extracts  
241 (**Figure 2E**). Based on these results, we then narrowed our focus on the impact of *pCharme* ablation  
242 on cardiac development and morphogenesis and studied the occurrence of any histological phenotype  
243 associated with these biological processes at embryonal stages. In agreement with the gene expression  
244 analysis, haematoxylin and eosin staining of *Charme*<sup>KO</sup> and WT cardiac cryo-sections from E13.5  
245 embryos showed a pronounced alteration of the myocardium morphology, which results in an  
246 overgrowth of the compact layer (**Figure 2-figure supplement 1D**). To better understand the  
247 histological differences and further examine whether compaction occurs at the expense of ventricular  
248 trabeculae, we performed immunofluorescence staining and western blot analysis for the natriuretic  
249 peptide A (NPPA) factor, a known marker of the embryonic trabecular cardiomyocytes ([Choquet et](#)  
250 [al., 2019](#); [Horsthuis et al., 2008](#)). In parallel, we also analysed the heart sections for cardiac  
251 vasculature, since the process of trabecular compaction is known to be temporally coupled with the  
252 formation of blood vessels during development ([Samsa et al., 2013](#)). To note, the circulatory system  
253 development category was among the main GO enriched for *pCharme* down-regulated targets. We  
254 found that mutant hearts (E13.5 and E15.5) display a significant reduction of Nppa<sup>+</sup> trabeculae  
255 (**Figure 2F**; **Figure 2-figure supplement 1E,2F**), which parallels the diminished density of the  
256 capillary endothelium, as imaged by lectin staining (**Figure 2G**). Therefore, these data suggest that  
257 the early expression of *pCharme* ensures the achievement of cell-cycle and morphogenetic programs  
258 important for CM maturation, myocardial geometry and vascular network formation. The  
259 developmental need for *pCharme* is also important for the preservation of cardiac function and  
260 structure in adulthood, as a progressive deterioration of the systolic function, which becomes  
261 significant at 9 months of age (**Figure 2-figure supplement 1G**; **Table S3**), was observed in  
262 *Charme*<sup>KO</sup> mice.

**Figure 2**

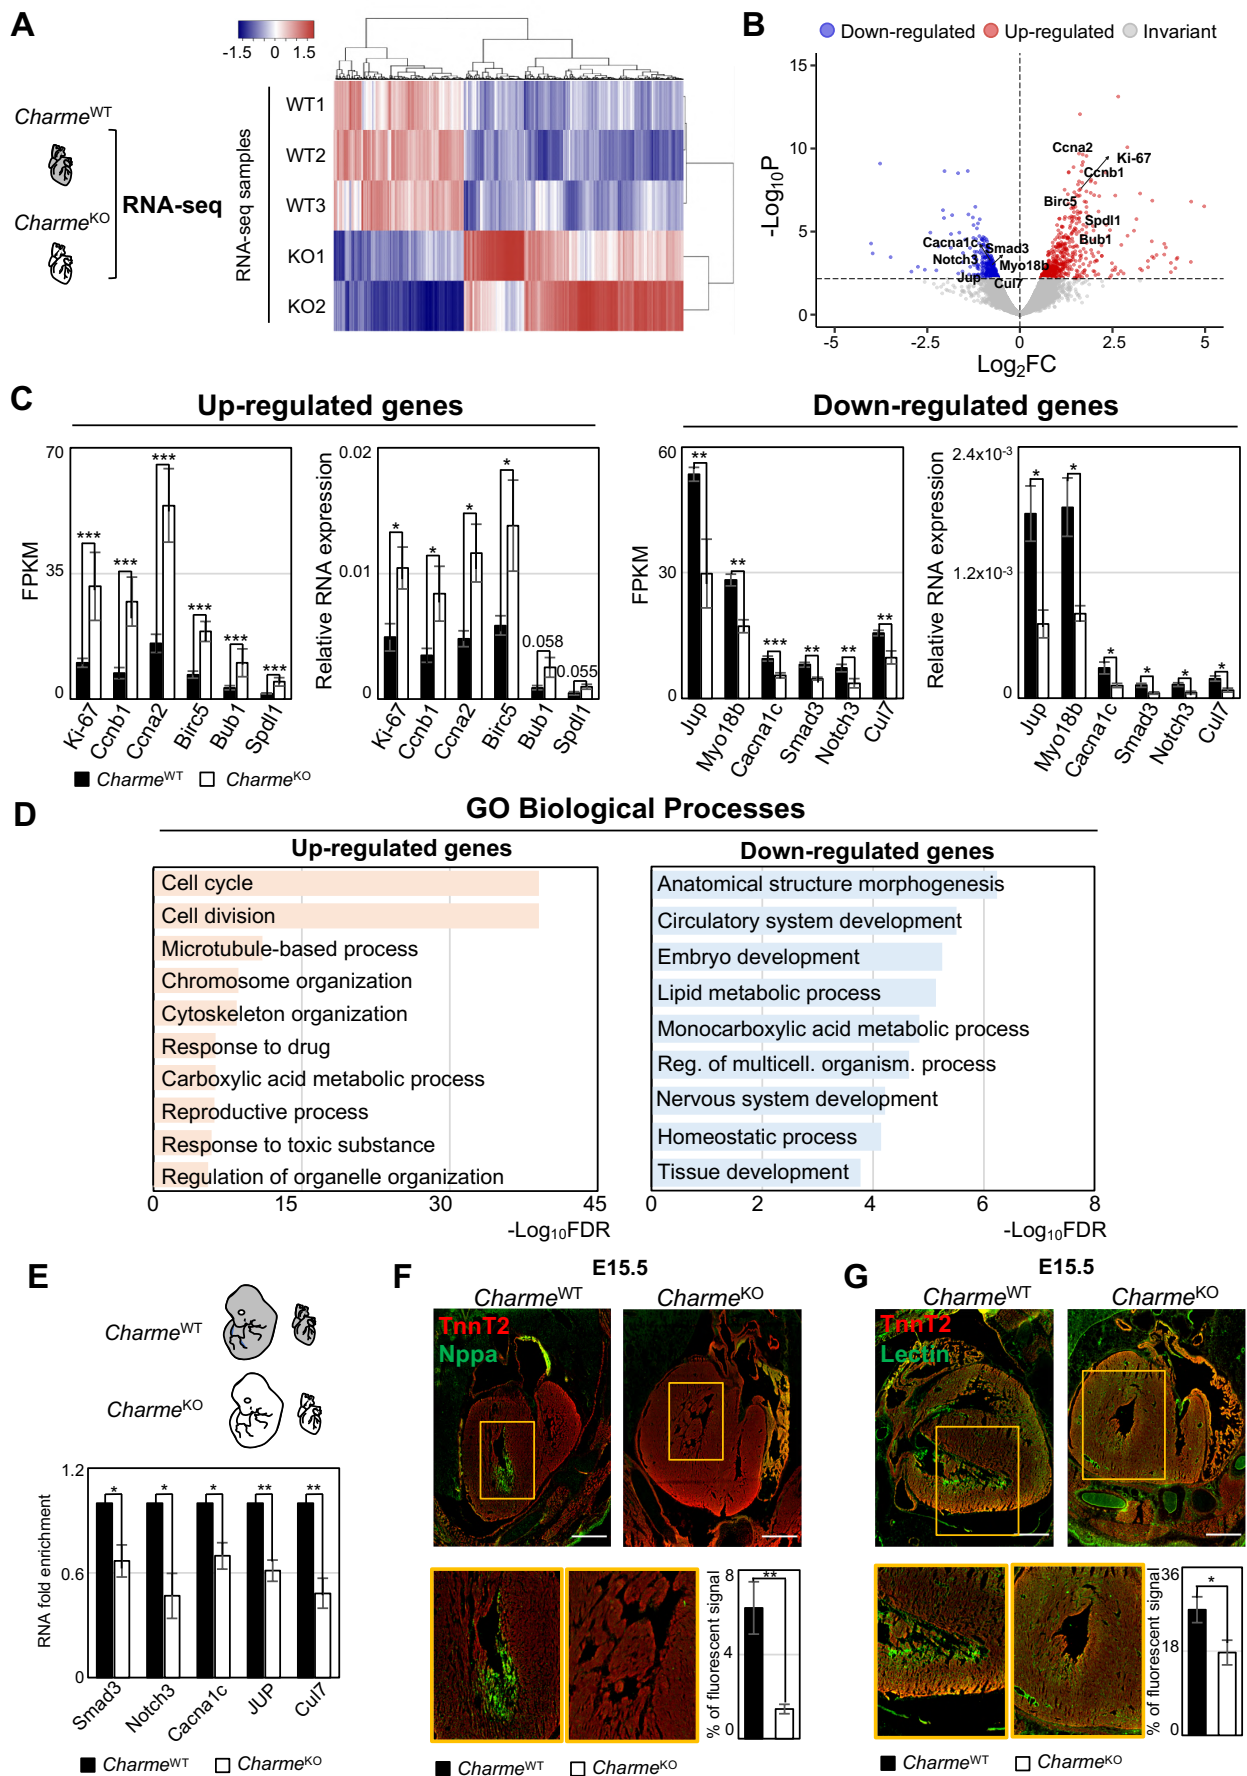

264 **Figure 2. Genome-wide profiling of cardiac *Charme*<sup>WT</sup> and *Charme*<sup>KO</sup> transcriptomes**  
265 **A)** Heatmap visualization from RNA-seq analysis of *Charme*<sup>WT</sup> and *Charme*<sup>KO</sup> PN hearts. Plot was  
266 produced by heatmap3 (<https://cran.r-project.org/web/packages/heatmap3/vignettes/vignette.pdf>)  
267 using the FPKM values for each RNA-seq sample. FPKM: Fragments Per Kilobase of transcript per  
268 Million mapped reads. Schematic representation of RNA samples collected for sequencing analysis  
269 from *Charme*<sup>WT</sup> and *Charme*<sup>KO</sup> hearts is shown. **B)** Volcano plots showing differential gene  
270 expression analysis from the RNA-seq analysis of *Charme*<sup>WT</sup> vs *Charme*<sup>KO</sup> PN hearts. Differentially  
271 expressed genes (DEGs) validated through RT-qPCR are in evidence. **C)** Average expression from  
272 RNA-seq (FPKM) and RT-qPCR (Relative RNA expression) quantification of up-regulated (left  
273 panel) and down-regulated (right panel) DEGs in *Charme*<sup>KO</sup> vs *Charme*<sup>WT</sup> PN hearts. Data were  
274 normalized to GAPDH mRNA and represent means  $\pm$  SEM of WT (n=5) vs KO (n=4) pools. **D)** Gene  
275 ontology (GO) enrichment analysis performed by WEBGESTALT (<http://www.webgestalt.org>) on  
276 up-regulated (left panel) and down-regulated (right panel) DEGs in *Charme*<sup>WT</sup> vs *Charme*<sup>KO</sup> pools of  
277 PN hearts. Bars indicate the top categories of biological processes in decreasing order of  $-\text{Log}_{10}\text{FDR}$ .  
278 All the represented categories show a FDR value  $<0.05$ . **E)** RT-qPCR quantification of *pCharme*  
279 targets in embryonal (E15.5) hearts. Schematic representation of RNA samples collection is shown.  
280 DEGs belonging to the GO:anatomical structure morphogenesis were considered for the analysis.  
281 Data were normalized to GAPDH mRNA and represent means  $\pm$  SEM of WT and KO (n=3) pools.  
282 **F)** Representative images from immunostaining for Nppa (green) and TnnT2 (red) in *Charme*<sup>WT</sup> and  
283 *Charme*<sup>KO</sup> (E15.5) cardiac sections. Scale bar: 500  $\mu\text{m}$ . Quantification of the area covered by Nppa  
284 fluorescent signal is shown aside. Data represent the mean (%)  $\pm$  SEM of at least 6 images from  
285 biological replicates for each genotype. **G)** Representative image from immunostaining for Lectin  
286 (green) and TnnT2 (red) in *Charme*<sup>WT</sup> and *Charme*<sup>KO</sup> (E15.5) cardiac section. Scale bars: 500  $\mu\text{m}$ .  
287 Quantification of the area of labelled vascular tissue is shown aside. Data represent the mean (%)  $\pm$   
288 SEM of at least 6 images from biological replicates for each genotype. Data information: \* $p < 0.05$ ;  
289 \*\* $p < 0.01$ , \*\*\* $p < 0.001$  unpaired Student's t test.

290

291

292

293

294

295

296

297

298



299 **In foetal cardiomyocytes *pCharme* nucleates the formation of RNA-rich condensates by**  
300 **interacting with MATR3.**

301 In differentiated myocytes, we previously demonstrated that CU-rich binding motifs inside *pCharme*  
302 coordinate the co-transcriptional recruitment and the subcellular localization of Matrin 3 (MATR3)  
303 ([Desideri et al., 2020](#)), a nuclear matrix RNA/DNA binding protein involved in multiple RNA  
304 biosynthetic processes ([Coelho et al., 2016](#); [Banerjee et al., 2017](#)) and recently shown to play a role  
305 in chromatin repositioning during development ([Cha et al., 2021](#)). Interestingly, MATR3 protein was  
306 found very highly expressed in newborn mouse cardiomyocytes and heterozygous mice with  
307 mutations in MATR3 show congenital heart defects ([Quintero-Rivera et al., 2015](#)). Therefore, an  
308 intriguing possibility may be that *pCharme* plays a role in the localization of MATR3 in embryonal  
309 cardiac nuclei with possible implications in their physiology. To examine this hypothesis more  
310 directly, we first assessed the sub-cellular localization of *pCharme* in embryonal (E15.5) hearts by  
311 biochemical fractionation. RT-qPCR analyses revealed that, in line with what was previously  
312 observed in skeletal muscle, also in cardiomyocytes *pCharme* mainly localizes within the nucleus,  
313 while the fully spliced *mCharme* was enriched into the cytoplasm (**Figure 3-figure supplement 1A**).  
314 We next applied high-resolution RNA-fluorescence *in situ* hybridization (FISH) to visualize  
315 *pCharme* in embryonal hearts (**Figure 3A**; **Figure 3-figure supplement 1B**) and combined RNA-  
316 FISH with immunofluorescence to study its relative localization with MATR3 (**Figure 3B**). In  
317 agreement with subcellular fractionation, RNA-FISH experiments confirm the nuclear localization of  
318 *pCharme* and show its typical punctuate distribution overall the heart. Moreover, the analysis of the  
319 three-dimensional distribution of *pCharme* and MATR3 revealed a clear colocalization between their  
320 respective signals. Quantitative analysis of the over-lapping signals by 3D Pearson's correlation  
321 coefficient highlighted the formation of MATR3/*pCharme* nuclear condensates (**Figure 3-figure**  
322 **supplement 1C**). Based on these results, we then tested if the presence of *pCharme* can influence the  
323 nuclear localization of MATR3 *in vivo*. To this end, we performed MATR3 IF assays in wild-type



324 and *Charme*<sup>KO</sup> embryonal (E15.5) muscle biopsies and spinal cord nuclei, as a control (**Figure 3C;**  
325 **Figure 3-figure supplement 1D,3E**). We observed intense and discrete MATR3 positive signals in  
326 wild-type skeletal (**Figure 3-figure supplement 1D**) and cardiac (**Figure 3C**, upper panel) muscles  
327 expressing the lncRNA. Coherently with a *pCharme*-dependent MATR3 condensation, MATR3  
328 signals appeared more diffuse when *pCharme* was not expressed, as in *Charme*<sup>KO</sup> muscles and wild-  
329 type spinal cord nuclei (**Figure 3C**, middle and lower panels; **Figure 3-figure supplement 1D**).

**Figure 3**

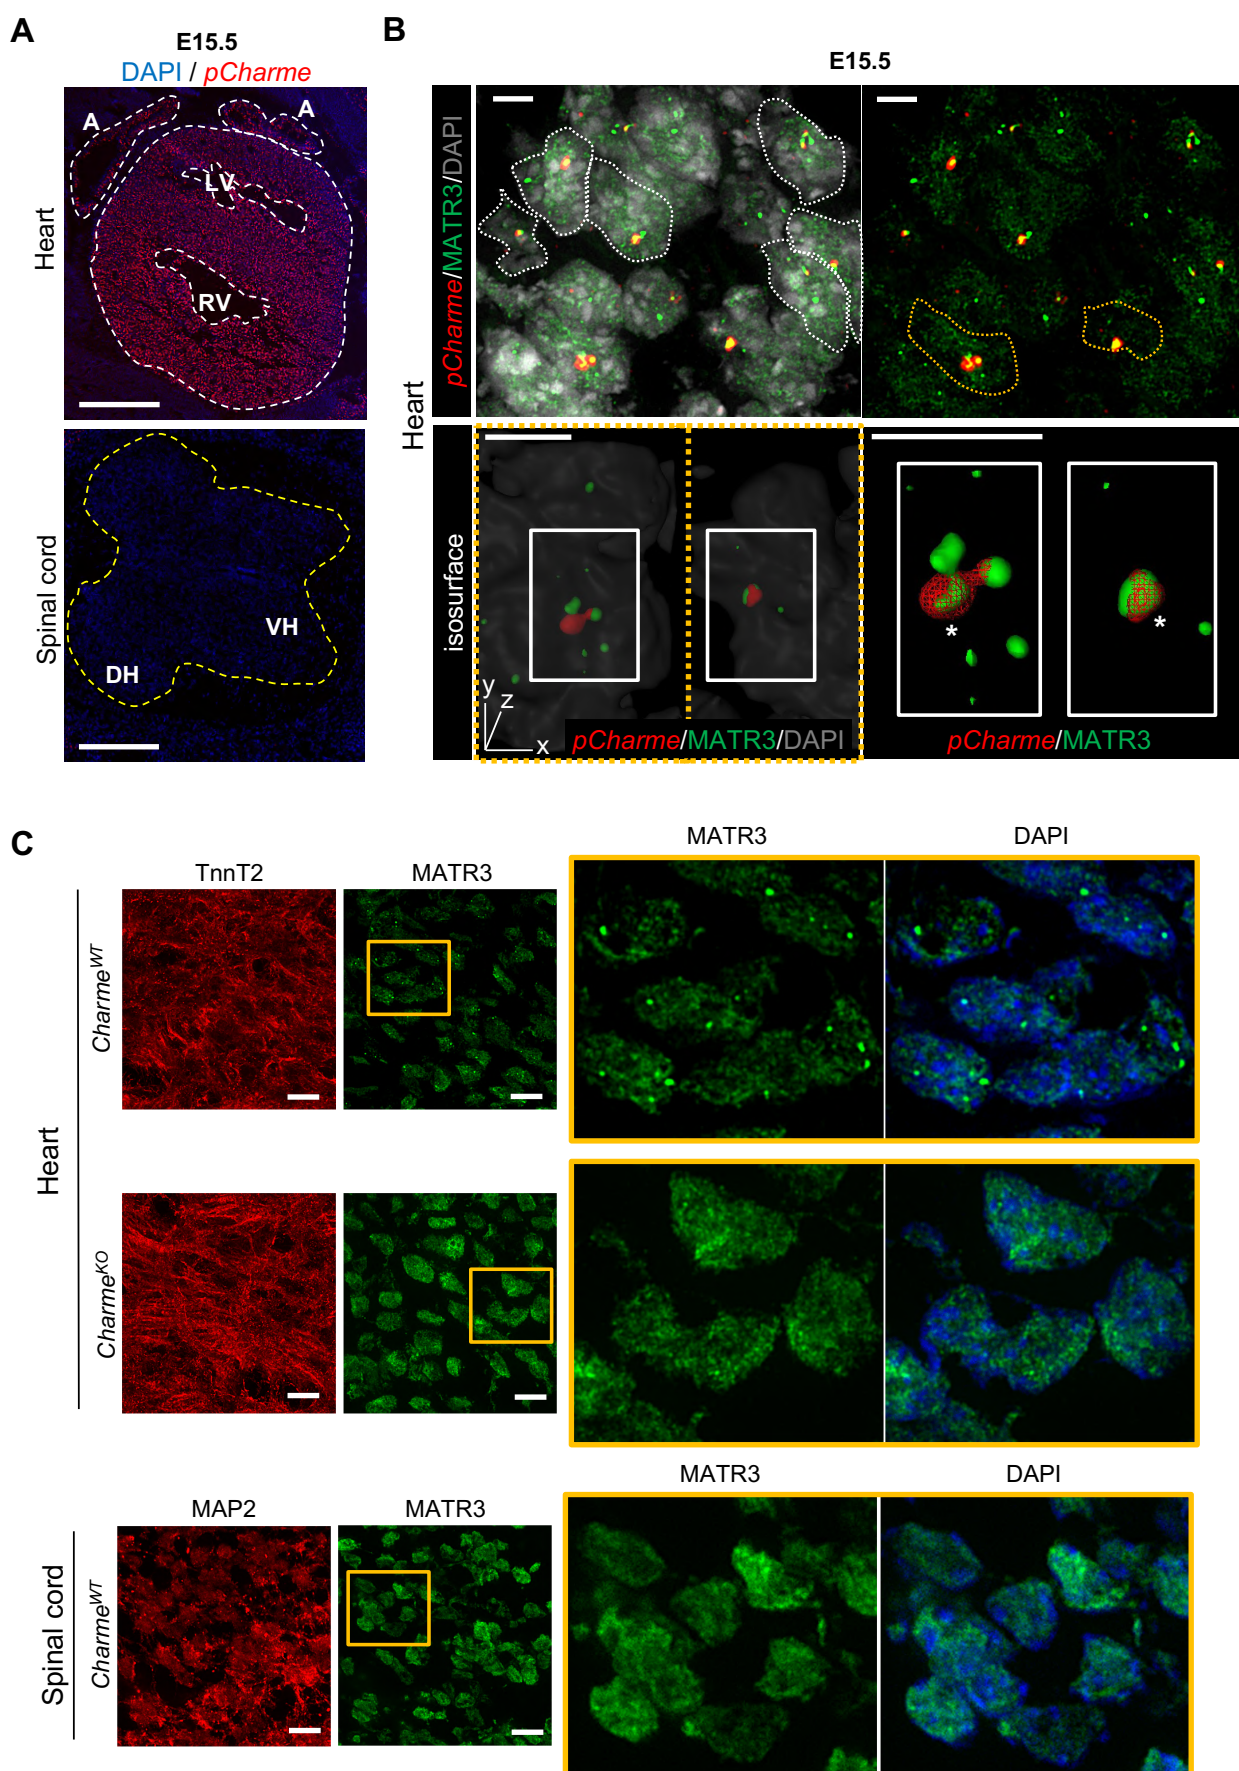

331 **Figure 3. In foetal cardiomyocytes *pCharme* nucleates the nuclear localization of MATR3**  
332 **A)** RNA-FISH for *pCharme* (red) and DAPI staining (blue) in *Charme*<sup>WT</sup> hearts and spinal cord from  
333 E15.5 embryos sections. Signal is specifically detected in whole heart (white dashed lines) while no  
334 signal is detected in spinal cord (yellow dashed line). A: Atria; LV and RV: Left and Right ventricle;  
335 DH and VH: Dorsal and Ventral horn. Scale bars, 500 µm. **B)** Upper panel: RNA-FISH for *pCharme*  
336 (red) combined with immunofluorescence for MATR3 (green) and DAPI staining (gray) in  
337 *Charme*<sup>WT</sup> hearts from E15.5 embryos cryosections. Dashed lines show the edge of the nuclei. Lower  
338 panel: selected nuclei of interest (yellow dashed lines in upper panel) were enlarged and processed  
339 for isosurface reconstruction (left panel) and digital magnification (right panel) where overlapped  
340 signals are shown (asterisks). Scale bars 5 µm. **C)** Upper panel: Immunostaining for MATR3 (green),  
341 TNNT2 (red) and DAPI (blue) in *Charme*<sup>WT</sup> and *Charme*<sup>KO</sup> hearts from E15.5 embryos. Lower panel:  
342 immunostaining for MATR3 (green), Map2 (red) and DAPI (blue) in *Charme*<sup>WT</sup> and *Charme*<sup>KO</sup> spinal  
343 cord from E15.5 embryos. The selected regions of interest (orange squares) were digitally enlarged  
344 on the right panels. Each image is a representative of three individual samples. Scale bars, 10 µm.  
345  
346  
347  
348  
349  
350  
351  
352  
353  
354  
355  
356  
357  
358  
359  
360

361 We then applied a straightforward and RNA-centric approach to directly identify the MATR3-bound  
362 transcripts in the context of cardiac development. To this aim, we performed a MATR3 cross-linking  
363 immunoprecipitation (CLIP) assay in E15.5 hearts and sequenced the total RNA collected from two  
364 independent experiments (**Figure 4A**). Western blot analysis of protein extracts was carried out with  
365 anti-MATR3 antibodies to verify the enrichment and proper size of MATR3 in the  
366 immunoprecipitated samples and to quantify the efficiency of protein recovery (**Figure 4-figure**  
367 **supplement 1A**, left panel). Moreover, RT-qPCR analysis of the retrieved RNAs evidenced the  
368 specific enrichment of *pCharme*, but not *mCharme*, in the MATR3-immunoprecipitated samples, thus  
369 supporting the distinctive binding of the protein to the nuclear isoform (**Figure 4-figure supplement**  
370 **1A**, right panel). Analysis of MATR3-associated RNAs across the sequenced transcriptome (**Figure**  
371 **4-figure supplement 1B**) led to the identification of 951 cardiac expressed transcripts which were  
372 significantly bound by MATR3 (log<sub>2</sub> Fold enrichment > 2 and FDR value <0.05; **Table S4**), a subset  
373 of which were also validated by RT-qPCR analyses (**Figure 4-figure supplement 1C,4D**). In line  
374 with the binding propensities exhibited in other cell systems ([Uemura et al., 2017](#)), most of the  
375 MATR3 enrichments were located within the introns of mRNA precursors (**Figure 4B**). Strikingly,  
376 while the class of lncRNAs was poorly represented, we found *pCharme* at the top of the MATR3  
377 interactors (**Figure 4C**, **Table S4**). Together with the data provided by the imaging approaches, this  
378 result extends our previous evidence in skeletal muscle cells by showing *pCharme* as one of the most  
379 abundant lncRNA components of RNA-rich condensates formed together with MATR3 in embryonal  
380 cardiomyocytes and concentrating pre-mRNA encoding important cardiac regulators.

## Figure 4

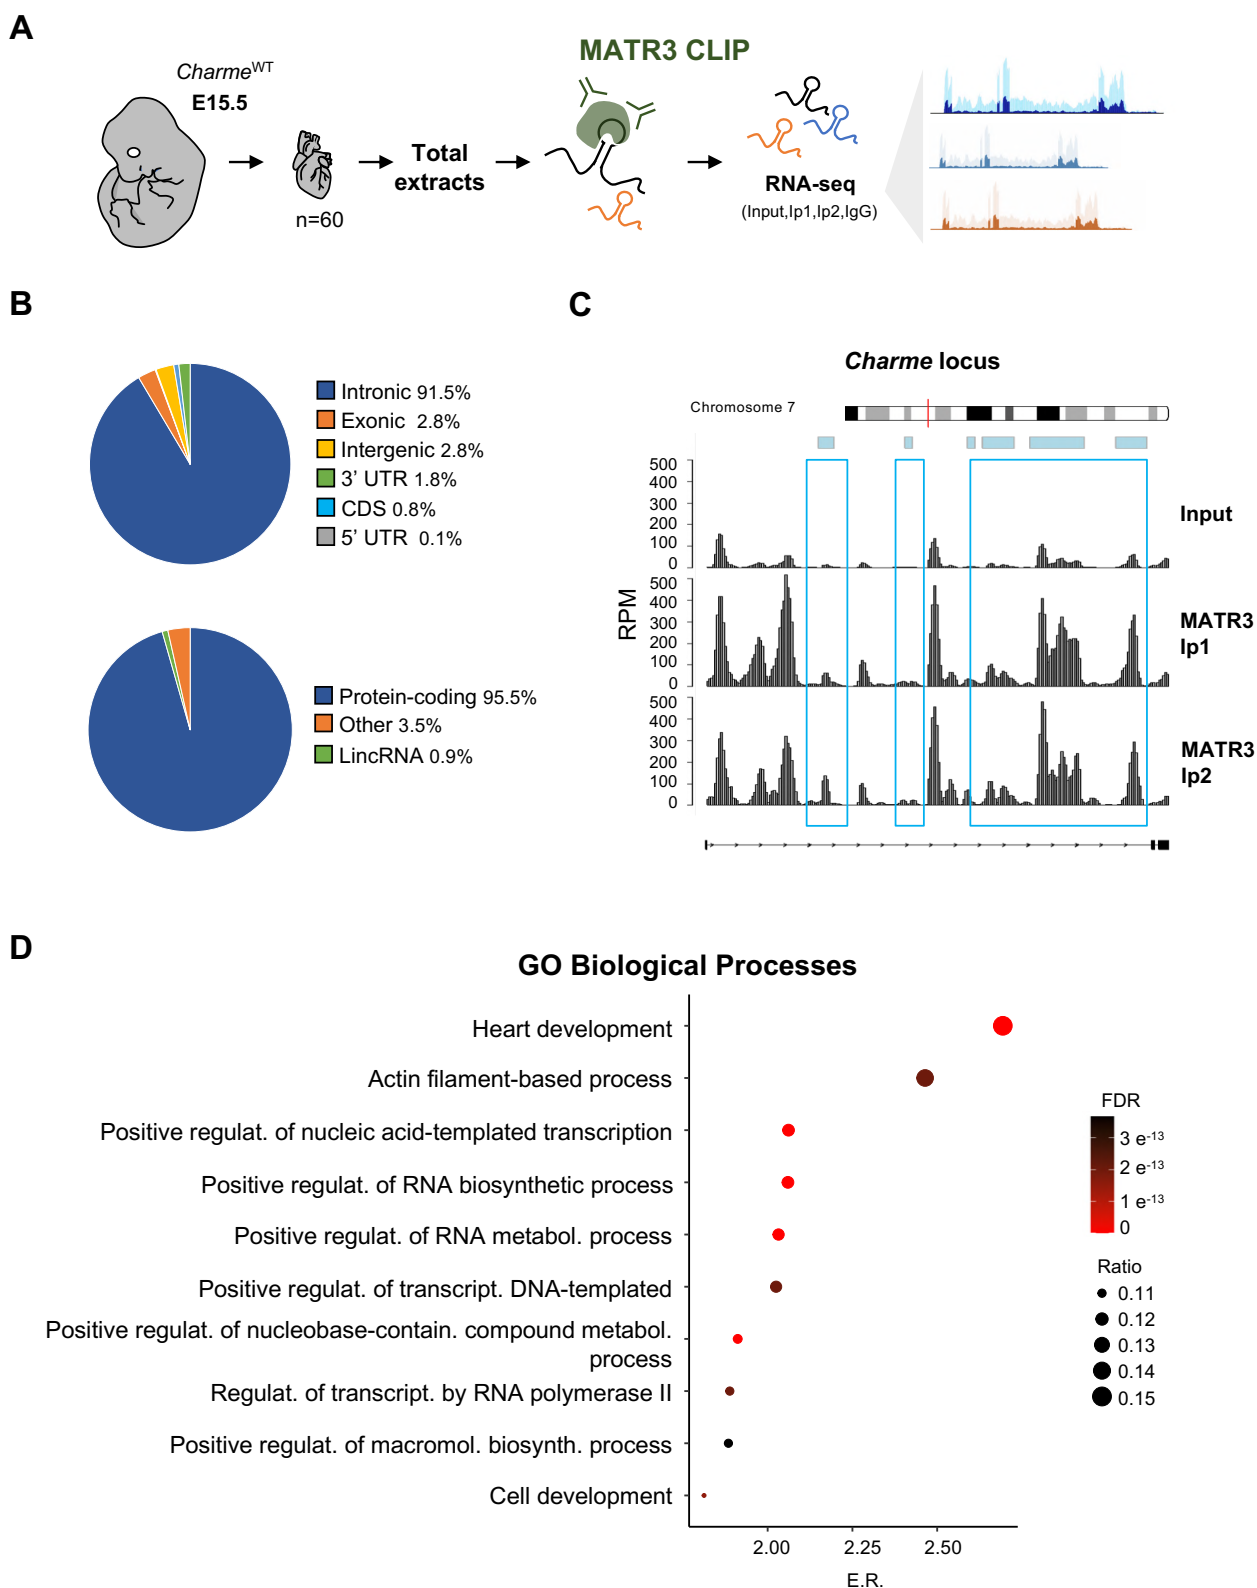

381

382

383

384

385 **Figure 4. MATR3/*pCharme* nuclear condensates contain key regulators of heart development**  
386 **A)** Schematic representation of MATR3 cross-linked RNA immunoprecipitation (CLIP) and  
387 sequencing workflow on total extracts obtained from n=60 embryonal (E15.5) hearts. See **Materials**  
388 **and Methods** for details. **B)** Upper panel: pie-plot representing the genomic occupancy of MATR3  
389 enriched peaks ( $\log_2$  Fold enrichment  $> 2$  and FDR  $< 0.05$ ). Peaks overlapping multiple regions were  
390 assigned with the following priority: CDS, 3'UTR, 5'UTR, exons, introns and intergenic. Lower  
391 panel: pie plot representing transcript biotypes of 951 identified MATR3 interacting genes. Peaks  
392 overlapping multiple transcripts were assigned with the following priority: protein coding, lncRNA  
393 and other. Percentages relative to each group are shown. **C)** Genomic visualization of Input, Ip1 and  
394 Ip2 normalized read coverage tracks (RPM) from MATR3 CLIP-seq on *Charme* locus. MATR3  
395 peaks displaying  $\log_2$  Fold enrichment  $> 2$  in both Ip1 and Ip2 samples compared to Input are depicted  
396 as light blue squares and are demarcated by light blue boxes. Plot obtained using Gviz R package. **D)**  
397 GO enriched categories obtained with WebGestalt (<http://www.webgestalt.org>) on protein-coding  
398 genes overlapping MATR3 peaks. Dots indicate the top categories of biological processes  
399 (description in y-axis) in decreasing order of Enrichment Ratio (E.R.= overlapped genes/expected  
400 genes, x-axis). Dot size (Ratio) represents the ratio between overlapped genes and GO categories size  
401 while dot color (FDR) represents significance. All the represented categories show an FDR $<0.05$ .  
402

403

404

405

406

407

408

409

410

411

412

413

414

415

416



417 **The *pCharme*/MATR3 interaction in cardiomyocytes sustains developmental gene expression.**

418 A GO enrichment analysis of the 882 protein-coding set of transcripts directly bound by MATR3,

419 revealed heart development and RNA transcription as the most significantly enriched functional

420 categories (**Figure 4D**). Together with the developmental requirement of *pCharme* for both cardiac

421 gene expression and MATR3 nuclear localization, this result encouraged further studies on possible

422 targets shared by *pCharme* and MATR3 in the heart. To this aim, we intersected the list of MATR3

423 RNA interactors with DEGs from cardiac *Charme*<sup>WT</sup> vs *Charme*<sup>KO</sup> transcriptomes. We found that the

424 abundance of MATR3-bound RNAs shows a global tendency to be reduced in the *Charme*<sup>KO</sup>

425 condition (**Figure 5A**). In line with this, the enrichment of MATR3 targets was progressively

426 increased as the significance (FDR) of down-regulation increased (**Figure 5B**, upper panel), in respect

427 to a random group of genes with the same numerosity of MATR3 targets (**Figure 5B**, lower panel).

428 Specifically, we found that 41 (12%) out of the 340 genes that were down-regulated in *Charme*<sup>KO</sup>

429 hearts (Figure 5C) were also bound by MATR3 (**Figure 5C**, left panel), while a reduced binding was

430 found to transcripts which levels do not change (invariant) or result more abundant upon *pCharme*

431 ablation (**Figure 5C**, middle and right panels). By checking the distribution of these common

432 *pCharme*/MATR3 targets across the *Charme*<sup>KO</sup> down-regulated GO terms (**Figure 2D**; **Figure 2-**

433 **figure supplement 1B**), we found embryo development, anatomical structure morphogenesis and

434 circulatory system development as the top three represented categories (**Figure 5D**). Intriguingly,

435 inside these categories, we found genes such as *Cacna1c*, *Notch3*, *Myo18B* and *Rbm20*, whose role

436 in cardiac physiopathology was extensively studied ([Goonasekera et al., 2012](#); [Tao et al., 2017](#); [Ajima](#)

437 [et al., 2008](#); [van den Hoogenhof et al., 2018](#)). Collectively, these data offer an unprecedented

438 knowledge on the RNA-binding propensities of MATR3 in the embryonal heart and identify a subset

439 of MATR3-bound RNAs whose levels are influenced by *pCharme*. To test whether the expression of

440 these *pCharme* target genes was also influenced by MATR3, we then purified cardiac primary cells

441 from wild-type hearts for transfection with control (si-SCR) or MATR3 (si-MATR3) siRNAs (**Figure**

442 **5E)** focusing our analysis on a subset of well-known cardiac effectors taken from the top three GO  
443 categories. RT-qPCR analysis performed on RNA extracted from these samples revealed that 3 out  
444 of 4 tested genes exhibited a significant expression decrease upon MATR3 depletion (**Figure 5E**).

**Figure 5**

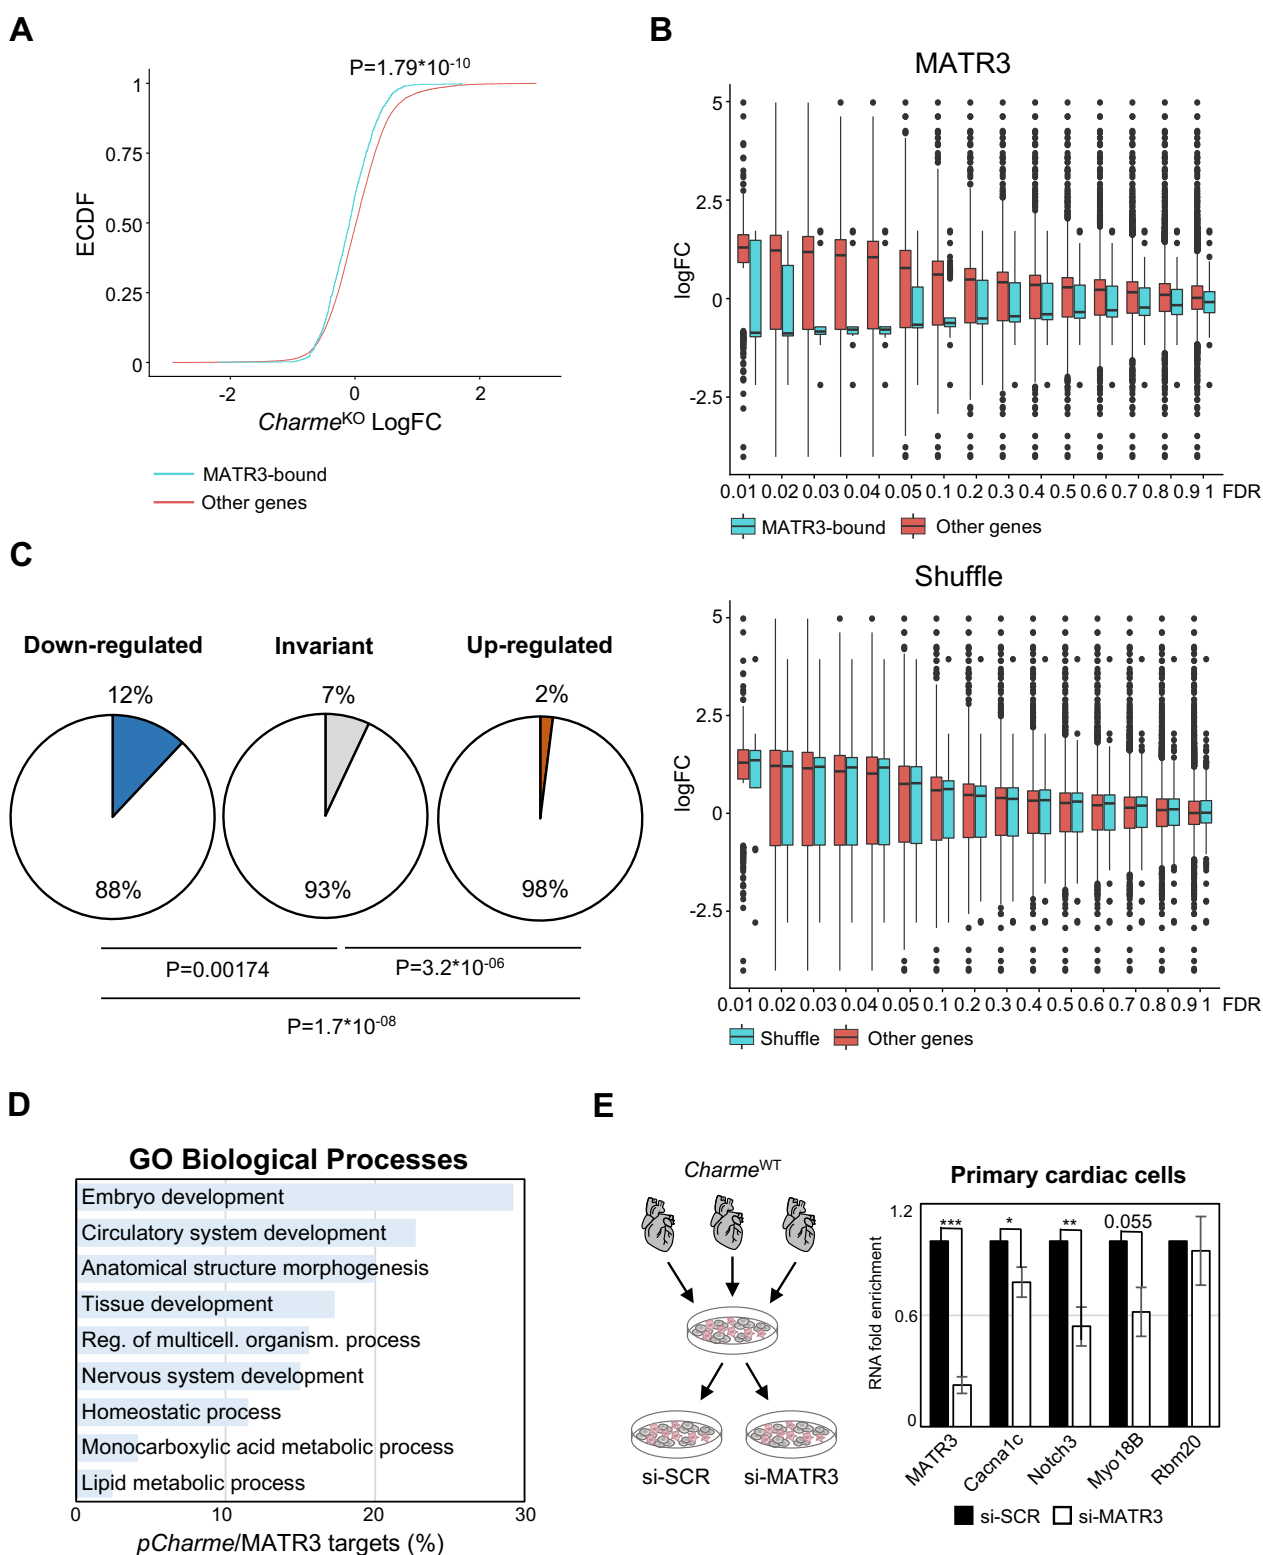

445

446

447

448

449 **Figure 5. The *pCharme*/MATR3 interaction in cardiomyocytes sustains developmental genes**  
450 **expression**

451 **A)** Empirical cumulative distribution functions (ECDF) showing that MATR3-bound RNAs have a  
452 reduced abundance in the *Charme*<sup>KO</sup> condition compared to the other expressed genes. Significance  
453 was determined using a two-sided Kolmogorov–Smirnov (KS) test. **B)** *Charme*<sup>KO</sup> logFC of MATR3  
454 targets (red boxplots) and other genes (cyan boxplots) were compared selecting deregulated genes  
455 with decreasing FDR threshold. The difference between medians of groups were exacerbated when  
456 more significant deregulated genes were evaluated. This effect is specific for MATR3 targets, since  
457 it is lost when a random group of genes was evaluated (Shuffle). **C)** Pie chart depicting the percentage  
458 of MATR3 targets in *Charme*<sup>KO</sup> down-regulated, invariant or up-regulated genes. Significance of  
459 enrichment or depletion was assessed with two-sided Fisher’s Exact test. **D)** Percentage (%) of  
460 MATR3-bound transcripts in the GO categories identified for *Charme*<sup>KO</sup> down-regulated genes  
461 (**Figure 2D**). **E)** Left panel: Schematic representation of primary cells extraction from *Charme*<sup>WT</sup>  
462 hearts. Once isolated, cells were plated and transfected with the specific siRNA (si-MATR3) or  
463 control siRNA (si-SCR). See **Materials and Methods** for details. Right panel: RT-qPCR  
464 quantification of MATR3, *Cacna1c*, *Notch3*, *Myo18B* and *Rbm20* levels in primary cardiac cells  
465 treated with si-SCR or si-MATR3. Data were normalized to GAPDH mRNA and represent mean ±  
466 SEM of 4 independent experiments. Data information: \*p < 0.05; \*\*p < 0.01; \*\*\*p < 0.001, unpaired  
467 Student’s t test.

468

469

470

471

472

473

474

475

476

477

478

479

480

481 Our results demonstrate that in the developing heart RNA-rich MATR3-condensates form at the sites  
482 of *pCharme* transcription and control the expression of important regulators of embryo development,  
483 cardiac function, and morphogenesis. To the best of our knowledge, no previous research has given  
484 such an insight into the importance of specific lncRNA/RNA binding protein interactions occurring  
485 at the embryonal stages of mammalian heart development. As MATR3 is involved in multiple nuclear  
486 processes, further studies will be necessary to address how the early interaction of the protein with  
487 *pCharme* impacts on the expression of specific RNAs, either at transcriptional or post-transcriptional  
488 stages.

489

## 490 **DISCUSSION**

491 In living organisms, the dynamic assembly and disassembly of distinct RNA-rich molecular  
492 condensates influences several aspects of gene expression and disease ([Rodén et al., 2021](#)). The  
493 engagement of specific lncRNAs can enhance the biochemical versatility of these condensates  
494 because of the extraordinary tissue-specificity, the structural flexibility and the propensity of this  
495 class of RNAs to gather macromolecules ([Buonaiuto et al., 2021](#)). Furthermore, the maintenance of  
496 specific lncRNAs on the chromatin combined with their scaffolding activity for RNA and proteins  
497 can cunningly seed high-local concentrations of molecules to specific loci ([Bhat et al., 2021](#); [Ribeiro  
498 et al., 2018](#)). The occurrence of alternative RNA processing events eventually leads to the formation  
499 of diverse lncRNA isoforms, thus refining the biochemical properties and the binding affinities of  
500 these ncRNAs. This suggestive model perfectly fits with *pCharme* and provides mechanistic insights  
501 into the physiologic importance of this lncRNA in muscle. In fact, of the two different splicing  
502 isoforms produced by the *Charme* locus, only the unspliced and nuclear *pCharme* isoform was found  
503 to play an epigenetic, architectural function in skeletal myogenesis.

504 In this study, we extend our earlier findings to embryogenesis, taking advantage of our previously  
505 generated *Charme*<sup>KO</sup> mouse model. We show that the temporal and cell-type specific expression of

506 *pCharme* in embryos supervises heart development and morphogenesis through the regulation of pro-  
507 differentiation and cell cycle-related genes. Mechanistically, we provide evidence on the engagement  
508 of *pCharme* in RNA-rich condensates acting as chromatin hubs for MATR3, a RNA-binding protein  
509 highly abundant in the foetal heart and causing, upon mutation, congenital heart defects in both human  
510 and mouse ([Quintero-Rivera et al., 2015](#)). In the absence of *pCharme*, these condensates do not form  
511 *in vivo* with consequent impairment of the developmental gene expression, which ultimately leads to  
512 cardiac malformations. Therefore, these findings add an important dowel to the characterization of  
513 *pCharme*, by valorising the significance of its functional interaction with the nuclear matrix protein  
514 MATR3 in the embryonal heart (**Figure 6**).

515

**Figure 6**

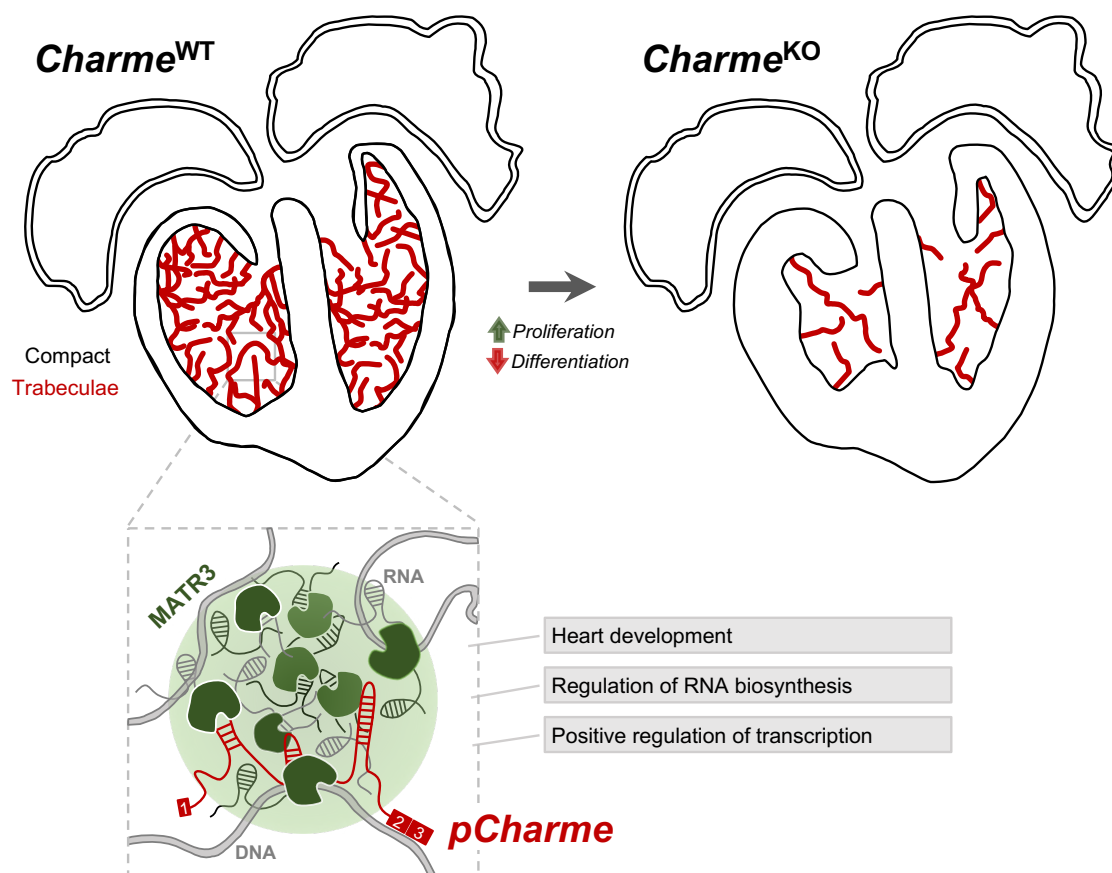

516

517



518 **Figure 6. Proposed model for *pCharme* functions during heart development.**

519 In physiological conditions (*Charme*<sup>WT</sup>), *pCharme* is required for the expression of several genes that  
520 are involved in cardiomyocytes proliferation, differentiation and maturation at developmental stages.  
521 The lncRNA-dependent nucleation of MATR3 protein contributes to the expression of genes involved  
522 in heart development. *pCharme* absence (*Charme*<sup>KO</sup>) leads to a substantial remodelling of the murine  
523 heart morphology.

524  
525 Besides the clear implication in cardiac pathologies, these results also underlie the importance of  
526 studying cardiomyogenesis in animal models. Specifically, the proliferative response of  
527 cardiomyocytes to *pCharme* knockout was not expected and it has given a novel and interesting facet  
528 to its characterization. Indeed, while our previous transcriptomic studies, carried out in myoblast cell  
529 lines, minimized the role of this lncRNA by limiting its impact to the terminal differentiation of  
530 skeletal myocytes ([Ballarino et al., 2018](#)), the herein analyses revealed a much stronger connection  
531 between the regulation of proliferation and maturation of cardiomyocyte and enabled unprecedented  
532 advancement into the understanding of the *pCharme* function *in vivo*. Furthermore, this system was  
533 also crucial for demonstrating the importance of *pCharme* expression in cardiac cells for the  
534 preservation of the cardiac functions in adulthood, since adult *Charme*<sup>KO</sup> mice develop a significant  
535 reduction of systolic function with initial signs of cardiac dilation, denoting an early phase of  
536 cardiomyopathy. These results are supported by recently published data suggesting that the transition  
537 of cardiomyocytes toward an immature phenotype *in vivo* is associated with the development of  
538 dilated cardiomyopathy ([Ikeda et al., 2019](#)). Finally, even more important is the observation that  
539 several regulators of embryonic development (i.e. Smad3, Notch3) and myogenic components (i.e.  
540 *Cacna1c*, Myosin-18B) are dysregulated upon *pCharme* knockout. Notably, mutations of these genes  
541 have been linked to the onset of several cardiomyopathies and heart failure ([Goonasekera et al., 2012](#);  
542 [Tao et al., 2017](#); [Ajima et al., 2008](#); [van den Hoogenhof et al., 2018](#)). Therefore, the expression of  
543 *pCharme* in early development ensures the proper expression of genes that control the balance  
544 between proliferation and differentiation and, as consequence, the morphology of the heart.

545 Recent cardiovascular studies have uncovered essential roles for lncRNAs in cardiac development  
546 and disease ([Scheuermann et al., 2013](#); [Anderson et al., 2016](#); [Ritter et al., 2019](#)). However, a still  
547 unmet need is to disentangle non-canonical lncRNA-mediated mechanisms of action to gain insight  
548 into more successful diagnosis and therapeutics for enhancing cardiomyogenesis. In this direction,  
549 many efforts are aimed at the study of ncRNAs, not only to gain a deeper comprehension of the  
550 molecular mechanisms underneath disease onset and to facilitate more accurate classifications of  
551 patient subpopulations, but also to use them as possible diagnostic biomarkers or therapeutic targets  
552 ([Buonaiuto et al., 2021](#)). If, on the one hand, studying *pCharme* can provide new knowledge on  
553 cardiomyopathies, on the other, it might provide a new perspective on cardiac regeneration, as its  
554 depletion increases cell cycle rates. In fact, the induction of cardiomyocyte proliferation has  
555 represented a main challenge in the last decades as a possible approach to facing myocardial infarction  
556 ([Chu et al., 2016](#)), and it is still considered an important intervention strategy. In this view, we found  
557 in humans a newly discovered locus that produces a syntenic *pCharme* transcript with equivalent  
558 structure and tissue-specificities as the murine lncRNA ([Ballarino et al., 2018](#)). Future efforts will be  
559 devoted to clarifying the implication of this transcript in those human cardiomyopathies where  
560 pathological remodelling of the cardiac muscle like those observed in the murine model occurs.

561

## 562 **MATERIALS AND METHODS**

### 563 **Ethics Statement and animal procedures**

564 All mice used in this work were C57BL6/J mice and all procedures involving laboratory animals were  
565 performed according to the institutional and national guidelines and legislations of Italy and according  
566 to the guidelines of Good Laboratory Practice (GLP). All experiments were approved by the  
567 Institutional Animal Use and Care Committee and carried out in accordance with the law (Protocol  
568 number 82945.56). All animals were kept in a temperature of  $22^{\circ}\text{C} \pm 3^{\circ}\text{C}$  with a humidity between  
569 50% and 60%, in animal cages with at least 5 animals.

570

### 571 **Isolation, transfection, and subcellular fractionation of mouse primary heart cells**

572 For primary heart cells isolation and transfection, 5 to 10 postnatal (PN3) hearts for each replicate  
573 (n=4) were pooled, harvested and kept at 37°C in culture medium (FBS 10%, 1X Non-Essential  
574 Aminoacids, 1x PenStrep and DMEM high glucose). Hearts were mashed with pestles for 2 min and  
575 cell isolation performed according to manufacturer's instructions (Neonatal Heart Dissociation Kit,  
576 Miltenyi Biotec). Cell suspension was centrifuged for 5 min at 600 x g and cells were resuspended in  
577 cell culture medium and plated in 22.1 mm plates. 1,5 million cells were transfected 48 hr later with  
578 75 mM si-SCR or si-MATR3 in 3 µl/ml of Lipofectamine RNAiMAX (Thermo Fisher Scientific) and  
579 100 µl/ml of Opti-MEM (Thermo Fisher Scientific), according to manufacturer's specifications. Total  
580 RNA was collected 48 hr after transfection. See **Table S5** for siRNA sequences. Subcellular  
581 fractionation of primary embryonal (E15.5) cardiac cells was performed using the Paris Kit (Thermo  
582 Fisher Scientific, cat#AM1921), according to the manufacturer's instructions.

583

### 584 **Whole-mount *in situ* hybridization**

585 Embryos were fixed overnight in 4% paraformaldehyde (PFA) in phosphate-buffered saline (PBS)  
586 plus 0.1% Tween® 20 (PBT) at 4°C, dehydrated through a series of methanol/PBT solutions (25%,  
587 50%, 75% and 100% methanol), and stored at -20°C until hybridization. Fixed embryos were  
588 rehydrated and rinsed twice in PBT. At this point, embryos were either digested with DNase and/or  
589 RNase or kept in PBT. All embryos were bleached in 6% hydrogen peroxide in PBT for 1h. Embryos  
590 were then rinsed 3 times in PBT for 5 min, digested with proteinase K (10 µg/ml in PBT) for 5 min  
591 at room temperature, washed once in 2 mg/ml glycine in PBT and twice in PBT for 5 min each, and  
592 post-fixed in 4% PFA/0.2% glutaraldehyde in PBT for 20 min at room temperature. Embryos were  
593 subsequently rinsed twice in PBT for 5 min and pre-hybridized at 70°C in hybridization solution  
594 (50% Formamide, 5x SSC, pH 5, 0.1% Tween 20, 50 µg/ml heparin, 50 µg/ml Torula RNA, 50 µg/ml

595 salmon sperm DNA) for 2h. Embryos were then incubated overnight at 70°C in hybridization solution  
596 containing 500 ng/ml of denatured riboprobe. Riboprobes were generated by *in vitro* transcription in  
597 the presence of Digoxigenin-UTP (Roche Diagnostics). The antisense and sense probes were  
598 synthesized from linearized pBluescript-*Charme*\_Ex2/3 plasmid. On the second day, embryos were  
599 washed twice in 50% formamide/4x SSC, pH 5/1% SDS and twice in 50% formamide/2x SSC, pH 5  
600 for 30 min each at 55°C. Embryos were then rinsed three times for 5 min in MABT (100 mM maleic  
601 acid, 150 mM NaCl, pH 7.5, 0.1% Tween), blocked for 2 h at room temperature in 10% goat serum  
602 in MABT, and incubated overnight at 4°C in 1% goat serum in MABT with 1:5000 alkaline  
603 phosphatase-coupled anti-Digoxigenin antibody (Roche Diagnostics). On the third day, embryos  
604 were washed in MABT twice for 5 min and 5 more times for 1 h each. Embryos were then rinsed  
605 twice in NTMT (100 mM NaCl, 100 mM Tris-HCl, pH 9.5, 50 mM MgCl<sub>2</sub>, 0.1% Tween) for 15 min  
606 each, followed by the staining reaction in BM Purple (Roche Diagnostics) in the dark for 30 min to  
607 12 h. Stained embryos were fixed overnight in 4% PFA in PBT, stored in PBT and photographed  
608 under a stereomicroscope.

609

#### 610 **Cryo-section *in situ* hybridization**

611 Embryos were dissected in cold PBS (pH 7.4) and fixed in 4% w/v PFA for 24 h at 4°C. Following  
612 fixation, the embryos were cryoprotected either in 30% w/v sucrose in PBS (for PFA-fixed embryos)  
613 or in 30% w/v sucrose in 0.1 M Tris pH 7.5 (for Z7-fixed embryos), embedded in Tissue freezing  
614 medium (Leica Microsystems), sectioned at 12 µm using a cryostat (Leica 1900UV) and transferred  
615 to superfrost plus (ROTH) slides. The sections were air-dried for at least 30 min and stored at -80°C  
616 until later use. For chromogenic detection, sections were post-fixed in 4% w/v PFA in PBS for 10  
617 min or in Z7, washed three times in PBS (or twice in 0.1 M Tris-HCl pH:7, 0.05 M NaCl and once  
618 in PBS for Z7) and incubated in acetylating solution (1.3% v/v triethanolamine, 0.03 N HCl, 0.25%  
619 v/v acetic anhydrite) for 10 min. Sections were then washed in PBS, incubated in 1% v/v Triton-X-

620 100 in PBS for 30 min and washed three times in PBS. Prehybridization was performed for 4-6 h in  
621 buffer H (50% v/v formamide, 5× SSC (0.75 M NaCl, 0.075 M sodium citrate), 5× Denhardt's (0.1%  
622 bovine serum albumin, 0.1% and 0.1% Polyvinylpyrrolidone), 250 µg/ml yeast RNA and 500 µg/ml  
623 salmon sperm DNA). Hybridization was performed in a humidified chamber for 16 h at 65°C in H  
624 buffer with DIG-labeled probe added (400 µg/ml). The probes were generated by *in vitro* transcription  
625 in the presence of Digoxigenin-UTP (Roche Diagnostics). Following hybridization, sections were  
626 sequentially washed in 5× SSC (5 min, 65°C), 0.2× SSC (1 h, 65°C), 0.2× SSC (5 min, RT). Then  
627 they were incubated in AB buffer (0.1 M Tris pH 7.5, 0.15 M NaCl) for 5 min, and in blocking  
628 solution (10% v/v Fetal Calf Serum in AB) for 1–2 h at RT. Antibody incubation was performed for  
629 16 h at 4°C in AB buffer supplemented with 1% v/v Fetal Calf Serum and anti-DIG antibody coupled  
630 to alkaline phosphatase (1:5000 dilution; Roche). Sections were then washed thoroughly in AB and  
631 equilibrated in alkaline phosphatase buffer (AP - 0.1 M Tris-HCl pH: 9.5, 0.1 M NaCl, 0.05 M  
632 MgCl<sub>2</sub>) for 5 min. Alkaline phosphatase activity was detected in the dark in AP buffer supplemented  
633 with 45 mg/ml 4-nitrobluetetrazolium chloride (NBT, Roche) and 35 mg/ml 5-bromo-4-chloro-3-  
634 indolyl-phosphate (BCIP, Roche). The reaction was stopped with PBS and the sections were mounted  
635 in Glycergel (Dako). Sections were analysed and photographed under a stereomicroscope.  
636 Fluorescent detection was performed via Basescope™ assay (Advanced Cell Diagnostics, Bio-  
637 Techne) as previously described in [D'Ambra et al., 2021](#), with little modifications according to the  
638 manufacturer's instructions for tissue processing. Probes used to detect pCharme RNA (ref. 1136321-  
639 C1) were custom produced by Advanced Cell Diagnostics and designed to specifically target the  
640 intronic sequence in order to detect the unspliced transcripts.

641

#### 642 **Preparation of probe templates for *in-situ* hybridization experiments**

643 *pCharme* exon 2 and exon 3 were PCR-amplified from cDNA extracted from myotubes using  
644 *Charme\_Up*-BamHI and *Charme\_Down*-EcoRI primers (**Table S5**). PCR products were cloned into  
645 pBluescript ks(-) upon BamHI and EcoRI (Thermo Fisher Scientific) enzymatic restriction.

646

## 647 **Histology**

648 All hearts were fixed in 4% formaldehyde, embedded in OCT, and cut into 7  $\mu$ m sections. After  
649 washing with PBS 3 times for 5 min, the sections were stained for 7 min with eosin (Merk,  
650 cat#109844). Subsequently, slides were washed 3 times with PBS and then incubated with  
651 haematoxylin (Merk, 105175) for 90 s.

652

## 653 **Immunohistochemistry**

654 Prior to staining, embryonal E13.5 sections (4  $\mu$ m of thickness) were dewaxed in absolute xylene,  
655 rehydrated in decreasing concentrations of ethanol and subjected to antigen retrieval in 10 mM citrate  
656 buffer (pH 6.0) for 10 min. After PBS washing, sections were permeabilized in PBS-T buffer  
657 (PBS1X/0.1-0.3% Triton X-100) for 10 min at room temperature and blocked in 5% BSA. After  
658 overnight incubation with the primary antibody, slides were washed 3 times with TBS-T buffer (TBS  
659 1X/ 0.1% Tween-20), and then incubated with the secondary antibody for 1h at room temperature.  
660 Coverslips were mounted using ProLong Diamond Antifade Mountant (Thermo Fischer Scientific,  
661 P-36961). Fluorescence signals are pseudo colored in green (Nppa) or red (TnnT2) protein (**Figure**  
662 **4B**). Nuclei were counterstained with DAPI. Fresh E15.5 and PN tissues were embedded in OCT and  
663 then frozen in isopentane pre-chilled in liquid nitrogen. Cryo-sections (10  $\mu$ m of thickness) were fixed  
664 in PFA 4% at 4°C for 20 min prior staining with primary antibodies, as previously described ([Cazzella](#)  
665 [et al., 2012](#)). Antibodies and dilutions are reported in **Table S5**. DAPI, Ki-67, Nppa, TnnT2 and G.  
666 *simplicifolia* lectin immunofluorescence signals (**Figure 2E; Figure 3B and 3D**) were acquired with  
667 Carl Zeiss Microscopy GmbH Imager A2 equipped with Axiocam503 color camera. MATR3, TnnT2



668 and Map2 signals (**Figure 4D** and **4E**; **Figure 4-figure supplement 1E**) were acquired as Z stacks  
669 (200 nm path) by inverted confocal Olympus IX73 microscope equipped with a Crestoptics X-LIGHT  
670 V3 spinning disk system and a Prime BSI Express Scientific CMOS camera. Images were acquired  
671 as 16bit 2048x2048 pixel file by using 100X NA 1.40 and 60X NA 1.35 oil (UPLANS Apo) objectives  
672 and were collected with the MetaMorph software (Molecular Devices). The average number of Ki-  
673 67 positive nuclei from n=4 *Charme*<sup>WT</sup> and *Charme*<sup>KO</sup> post-natal cardiac sections was determined by  
674 dividing the number of immunolabeled nuclei over the total number of nuclei in each microscope  
675 field. For each replicate, from 4 to 18 fields were analysed with ImageJ. Nppa and *G. simplicifolia*  
676 lectins sub-tissutal localization (**Figure 4B**, **4C** and **4D**) was analysed by quantifying the ratio  
677 between the area occupied by the immunofluorescence signals and the total area of the left ventricle.  
678 Statistical analysis was performed using t-test, and the differences between means were considered  
679 significant at  $P \leq 0.05$ .

680

#### 681 **RNA extraction and RT-qPCR analysis**

682 Total RNA from cultured cells and tissues was isolated using TRI Reagent (Zymo Research),  
683 extracted with Direct-zol<sup>TM</sup> RNA MiniPrep (Zymo Research), treated with DNase (Zymo Research),  
684 retrotranscribed using PrimeScript Reagent Kit (Takara) and amplified by RT-qPCR using PowerUp  
685 SYBR-Green MasterMix (Thermo Fisher Scientific), as described in [Desideri et al., 2020](#). See **Table**  
686 **S5** for oligos details.

687

#### 688 **RNA-Seq Analysis**

689 To reduce biological variability, *Charme*<sup>WT</sup> and *Charme*<sup>KO</sup> 2-days littermates were sacrificed and  
690 hearts from the corresponding genotypes pooled together before RNA extraction (3 *Charme*<sup>WT</sup> pools,  
691 9 hearts each, 2 *Charme*<sup>KO</sup> pools, 3 hearts each). Validation analyses were performed on 2 additional  
692 *Charme*<sup>WT</sup> pools (6 hearts each) and 2 *Charme*<sup>KO</sup> pools (4 hearts each). Principal component analysis

693 (PCA) conducted on the RNA-seq data, revealed that the two groups were evidently distinguished for  
694 the first principal component (**Figure 2-figure supplement 1A**). Illumina Stranded mRNA Prep was  
695 used to prepare cDNA libraries for RNA-Seq that was performed on an Illumina Novaseq 6000  
696 Sequencing system at IIT-Istituto Italiano di Tecnologia (Genova, Italy). RNA-seq experiment  
697 produced an average of 26 million 150 nucleotide long paired-end reads per sample. Dark cycles in  
698 sequencing from Novaseq 6000 machines can lead to a high quality stretches of Guaninines artifacts;  
699 in order to remove these artifacts, low quality bases and N stretches from reads were removed by  
700 Cutadapt software using “-u -U”, “--trim-n” and “--nextseq-trim=20” parameters ([Martin et al.,](#)  
701 [2011](#)). Illumina adapter remotion were performed using Trimmomatic software ([Bolger et al., 2014](#)).  
702 Reads whose length after trimming was <35 nt were discarded. Reads were aligned to GRCm38  
703 assembly using STAR aligner software ([Dobin et al., 2013](#)). Gene loci fragment quantification were  
704 performed on Ensemble (release 87) gene annotation gtf using STAR `-quantMode GeneCounts`  
705 parameter. Read counts of “reverse” configuration files were combined into a count matrix file, which  
706 was given as input to edgeR ([Robinson et al., 2010](#)) R package for differential expression analysis,  
707 after removing genes with less than 10 counts in at least two samples. Samples were normalized using  
708 TMM. Model fitting and testing were performed using glmFIT and glmLRT functions. Gene-level  
709 FPKM values were calculated using rpk function from the edgeR package. FDR cutoff for selecting  
710 significant differentially expressed genes was set to 0.1. Genes with less than 1 average FPKM in  
711 both conditions were filtered out. Heatmap of differentially expressed genes was generated using  
712 heatmap3 R package ([Zhao et al., 2014](#)) from log2 transformed FPKM values. Volcano plot were  
713 generated using “Enhanced Volcano” R package  
714 ([bioconductor.org/packages/release/bioc/vignettes/EnhancedVolcano/inst/doc/EnhancedVolcano](https://bioconductor.org/packages/release/bioc/vignettes/EnhancedVolcano/inst/doc/EnhancedVolcano)).  
715 Gene Ontology analyses were performed on up-regulated and down-regulated protein coding genes  
716 using WebGestalt R package ([Liao Y et al., 2019](#)) applying Weighted Set Cover dimensionality  
717 reduction.

718

### 719 **Cross-linking immunoprecipitation (CLIP) assay**

720 A total of 60 *Charme*<sup>WT</sup> E15.5 embryonal hearts were collected and pestled for 2 min in PBS, 1x PIC  
721 and 1x PMSF. The solution was filtered in 70 µm strainer and the isolated cells were plated and UV-  
722 crosslinked (4,000 mJ) in a Spectrolinker UV Crosslinker (Spectronics corporation). Upon  
723 harvesting, cells were centrifuged 5 min at 600 x g and pellets resuspended in NP40 lysis buffer (50  
724 mM HEPES pH 7.5, 150 mM KCl, 2 mM EDTA, 1 mM NaF, 0.5% (v/v) NP40, 0.5 mM DTT, 1x  
725 PIC,) and incubated on ice for 15 min. Lysate was diluted to a final concentration of 1 mg/ml. 30 µl  
726 of Dynabeads Protein G magnetic particles (Thermo Fisher Scientific) per ml of total lysate were  
727 washed twice with 1 mL of PBS-Tween (0.02%), resuspended with 5 µg of MATR3 (**Table S5**) or  
728 IgG antibodies (Immunoreagents Inc.) and incubated for 2 h at room temperature. Beads were then  
729 washed twice with 1 mL of PBS-T and incubated with total extract overnight at 4°C. Beads were  
730 washed three times with 1 mL of HighSalt NP40 wash buffer (50 mM HEPES-KOH, pH 7.5, 500  
731 mM KCl, 0.05% (v/v) NP40, 0.5 mM DTT, 1x PIC) and resuspended in 100 µl of NP40 lysis buffer.  
732 For RNA sequencing, 75 µl of the sample were treated for 30 min at 50°C with 1.2 mg/ml Proteinase  
733 K (Roche) in Proteinase K Buffer (100 mM Tris-HCl, pH 7.5, 150mM NaCl, 12.5 mM EDTA, 2%  
734 (w/v) SDS). T For Western Blot analysis, 25 µl of the sample were heated at 95°C for 5 min and  
735 resuspended in 4x Laemmli sample buffer (BioRad)/50 mM DTT before SDS-PAGE.

736

### 737 **MATR3 CLIP-seq analysis**

738 Trio RNA-Seq (Tecan Genomics, Redwood City, CA) has been used for library preparation following  
739 the manufacturer's instructions. The sequencing reactions were performed on an Illumina Novaseq  
740 6000 Sequencing system at IGA Technology services. CLIP-sequencing reactions produced an  
741 average of 25 million 150 nucleotide long paired-end reads per sample Adaptor sequences and poor  
742 quality bases were removed from raw reads using a combination of Trimmomatic version 0.39

743 ([Bolger et al., 2014](#)) and Cutadapt version 3.2 ([Martin et al., 2011](#)) softwares. Reads whose length  
744 after trimming was <35 nt were discarded. Alignment to mouse GRCm38 genome and Ensembl  
745 87 transcriptome was performed using STAR aligner version 2.7.7a ([Dobin et al., 2013](#)). Alignment  
746 files were further processed by collapsing PCR duplicates using the MarkDuplicates tool included in  
747 the Picard suite version 2.24.1 (<http://broadinstitute.github.io/picard/>) and discarding the multi-  
748 mapped reads using BamTools version 2.5.1 ([Barnett et al., 2011](#)). Properly paired reads were  
749 extracted using SAMtools version 1.7 ([Li et al., 2009](#)). GRCm38 genome was divided into 200 bp  
750 long non-overlapping bins using the BEDtools makewindows tool ([Quinlan et al., 2010](#)). Properly  
751 paired fragments falling in each bin were counted using the BEDtools intersect tool filtering out reads  
752 mapping to rRNAs, tRNAs or mitochondrial genome in order to create sample-specific count files.  
753 These files were given as input to Piranha version 1.2.1 ([Uren et al., 2012](#)) using  $-x -s -u \theta$  parameters  
754 to call significant bins for MATR3 Ip and IgG samples. BEDtools intersect was used to assign each  
755 genomic bin to genes using Ensembl 87 annotation. For each gene the bin signal distribution in the  
756 input sample was calculated after normalization of fragment counts by the total number of mapping  
757 fragments. Ip significant bins presenting normalized signal lower than the upper-quartile value of the  
758 related gene distribution were filtered out. After this filter, significant bins belonging to Ip samples  
759 were merged using BEDTools merge tool. The number of fragments overlapping identified peaks and  
760 the number overlapping the same genomic region in the Input sample were counted and used to  
761 calculate fold enrichment (normalized by total mapping fragments counts in each data set), with  
762 enrichment P-value calculated by Yates' Chi-Square test or Fisher Exact Test where the observed or  
763 expected fragments number was below 5. Benjamini-Hochberg FDR procedure was applied for  
764 multiple testing corrections. Peaks presenting log<sub>2</sub> fold enrichment over Input >2 and FDR < 0.05 in  
765 both Ip samples were selected as enriched regions (**Table S3**). BEDtools intersect tool was used to  
766 annotate such regions based on their overlap with Ensembl 87 gene annotation and to filter out  
767 transcripts hosting regions enriched in the IgG sample. Furthermore, htseq-count software ([Anders et](#)

768 [al., 2015](#)) with *-s no -m union -t gene* parameters was used to count reads from deduplicated BAM  
769 files. Peaks overlapping transcripts with Input CPM (counts per million) > Ip CPM in both Ip samples  
770 were filtered out. Gene Ontology analysis was performed on protein coding genes overlapping  
771 enriched regions using WebGestalt R package ([Liao et al., 2019](#)). Bigwig of normalized coverage  
772 (RPM, reads per million) files were produced using bamCoverage 3.5.1 from deepTools tool set  
773 (<http://deeptools.readthedocs.io/en/develop>) on BAM files of uniquely mapping and deduplicated  
774 reads using *--normalizeUsing CPM* parameter ([Ramirez et al., 2014](#)). Normalized coverage tracks  
775 were visualized with IGV software (<https://software.broadinstitute.org/software/igv/>) and Gviz R  
776 package ([Hahne et al., 2016](#)).

777

## 778 **Protein analyses**

779 Protein extracts were prepared and analysed by western blot as in [Desideri et al., 2020](#). See **Table S5**  
780 for antibodies details.

781

## 782 **Single cell transcriptomics**

783 scRNAseq analysis was performed on publicly available datasets of E12.5 mouse hearts  
784 (SRR10969391, [Jackson-Weaver et al. 2020](#)). FASTQ reads were aligned, filtered and counted  
785 through the Cell Ranger pipeline (v4.0) using standard parameters. GRCm38 genome version was  
786 used in alignment step and annotation refers to Ensembl Release87. The dataset was cleaned  
787 (nFeature\_RNA > 200 and < 6000, percent.mt > 0 and < 5, nCount\_RNA > 500 and < 40000) and  
788 cells were clustered using Seurat 4.0.5 ([Stuart et al., 2019](#)). Cluster uniformity was then checked using  
789 COTAN ([Galfrè et al., 2020](#)) by evaluating if less than 1% of genes were over the threshold of 1.5 of  
790 GDI. If a cluster resulted not uniform, with more than 1% of genes above 1.5, a new round of  
791 clustering was performed. After this iterative procedure, the few remaining cells not fitting any  
792 cluster, were discarded. A dataset of 4014 cells and 34 clusters was obtained. COTAN function

793 *cotan\_on\_cluster\_DE* (github devel branch) was used to obtain a correlation coefficient and a *p*-value  
794 for each gene and each cluster. From the correlation matrix, a cosine dissimilarity between clusters  
795 was estimated and used to plot a dendrogram (with the ward.D2 algorithm, **Figure 1-figure**  
796 **supplement 1D**). The tree was used to decide which clusters could be merged. Cell type for each  
797 final cluster was assigned based on a list of markers ([Jackson-Weaver et al., 2020](#); [Li et al., 2016](#)) as  
798 follows. Cardiomyocytes (1834 cells): Myh6+, Nppa+, Atrial CM (333 cells): are also Myl1+, Myl4+  
799 , Ventricular CM (1289): are also Myl2+, Myl3+, interventricular septum CM (117 cells): are also  
800 TBX20+, Gja5+ ([Franco et al., 2006](#)), Venous Pole CM (95 cells): also Osr1+ ([Meilhac et al., 2018](#)),  
801 Outflow Tract CM (72 cells): also Is11+, Sema3c+, Neural crest cells (there are two clusters  
802 expressing their markers: 1.NC with 48 cells and 2.NC with 68 cells): Msx1+, Twist1+, Sox9+,  
803 Epicardial cells (359 cells): Cebpb+, Krt18+, Fibroblasts like cells (278 cells): Tcf21+, Fn1+,  
804 Endothelial cells (168 cells): Klf2+, Pecam1+, Cdh5+, Smooth muscle cells (710 cells): Cnn1+,  
805 Acta2+, Tagln2+, Tagln+, Hemopoietic myeloid cells (79 cells): Fcer1g+, Hemopoietic red blood  
806 cells (397 cells): Hba-a1+. The final UMAP plot with the cell assignment is shown in **Figure 1-figure**  
807 **supplement 1E**. Heatmap in **Figure 1-figure supplement 1F** shows a coherent assignment between  
808 final clusters and cell type with additional marker genes.

809

## 810 **Echocardiography**

811 The echocardiographer was blinded to the phenotypes. Mice were anaesthetised with 2.5% Avertin  
812 (Sigma T48402) to perform echocardiographic structural (measurement of left ventricular diameters  
813 and wall thickness) and functional (fractional shortening) analyses with a VEVO 3100 (Visualsonics)  
814 using a mx550d probe. We used avertin since it does not induce significant cardiodepressant effects,  
815 potentially affecting our echocardiographic experiments compared to ketamine combinations, such  
816 as ketamine+xylazine. The fractional shortening (FS) of the left ventricle was calculated as  $FS\% =$   
817  $(\text{left ventricular end-diastolic diameter (LVEDD)} - \text{left ventricular end-systolic diameter}) / \text{left ventricular end-diastolic diameter}$

818 (LVESD)/LVEDD) x 100, representing the relative change of the left ventricular diameters during  
819 the cardiac cycle. The mean FS of the left ventricle was determined by the average of FS  
820 measurements of the left ventricular contraction over 3 beats.

821

### 822 **Data accessibility**

823 The data presented in this study will be openly available in NCBI Gene Expression Omnibus (GEO)  
824 database (<https://www.ncbi.nlm.nih.gov/geo/>), reference number GSE200878 for RNA-seq data and  
825 GSE200877 for MATR3 CLIP-seq data.

826

### 827 **Statistical methods and rigor**

828 Statistical tests, p-values, and n for each analysis are reported in the corresponding figure legend. For  
829 each experiment, at least three individual animals or pools of littermates were used (see each figure  
830 legend for detail). No sex bias was introduced by randomly choosing among male and female mice.  
831 All analyses were performed by 1 or more blinded investigators.

832

### 833 **Competing interest**

834 The authors declare no competing interests.

835

### 836 **Acknowledgments**

837 The authors acknowledge Pietro Laneve, Francesca Pagano and Andrea Cipriano for helpful  
838 discussion, Alessandro Calicchio for cloning the probe templates for *in-situ* hybridization analyses  
839 and Marcella Marchioni for technical help. This work was supported by grants from Sapienza  
840 University (prot. RM11916B7A39DCE5 and RM12117A5DE7A45B) and POR FESR Lazio 2020-  
841 T0002E0001 to MB and ERC-2019-SyG (855923-ASTRA), AIRC (IG 2019 Id. 23053), EC-H2020



842 Marie Sklodowska-Curie Action ITN 2016 PN 721890; PRIN 2017 (2017P352Z4) and H2020  
843 Program “Sapienza Progetti Collaborativi” to IB.

844

845 **Author contribution**

846 M.B. designed, conceived and supervised the study; V.T. performed immunofluorescence assays on  
847 mouse sections, WB and subcellular fractionation analysis on heart extracts, MATR3-CLIP assay and  
848 cardiac primary cells isolation and transfection; G.B. performed TSS usage, TF binding motif and  
849 gene expression analysis on cardiac extracts; F.D. helped to perform MATR3-CLIP assay and carried  
850 out its validation and helped the retrieval of cardiac primary cells and their transfection; A.S.  
851 performed the bioinformatic analysis on RNA-seq and CLIP-seq data; T. S. performed RNA-FISH  
852 and RNA-FISH/IF assays; S.G. performed bioinformatic analysis on the cardiac single-cell dataset;  
853 D.M. prepared the libraries for RNA-seq experiments; L.S. and V.V. performed echocardiography  
854 experiments that were supervised by S.S.; E.P. performed *in situ* hybridization and whole-mount *in*  
855 *situ* hybridization assays; C.N. and A.M. provided expertise and supervised the experiments in mice.  
856 The paper was written by M.B with major contributions from I.B, V.T., G.B. and F.D. and suggestions  
857 from all the other authors.

858

## Figure 1-figure supplement 1

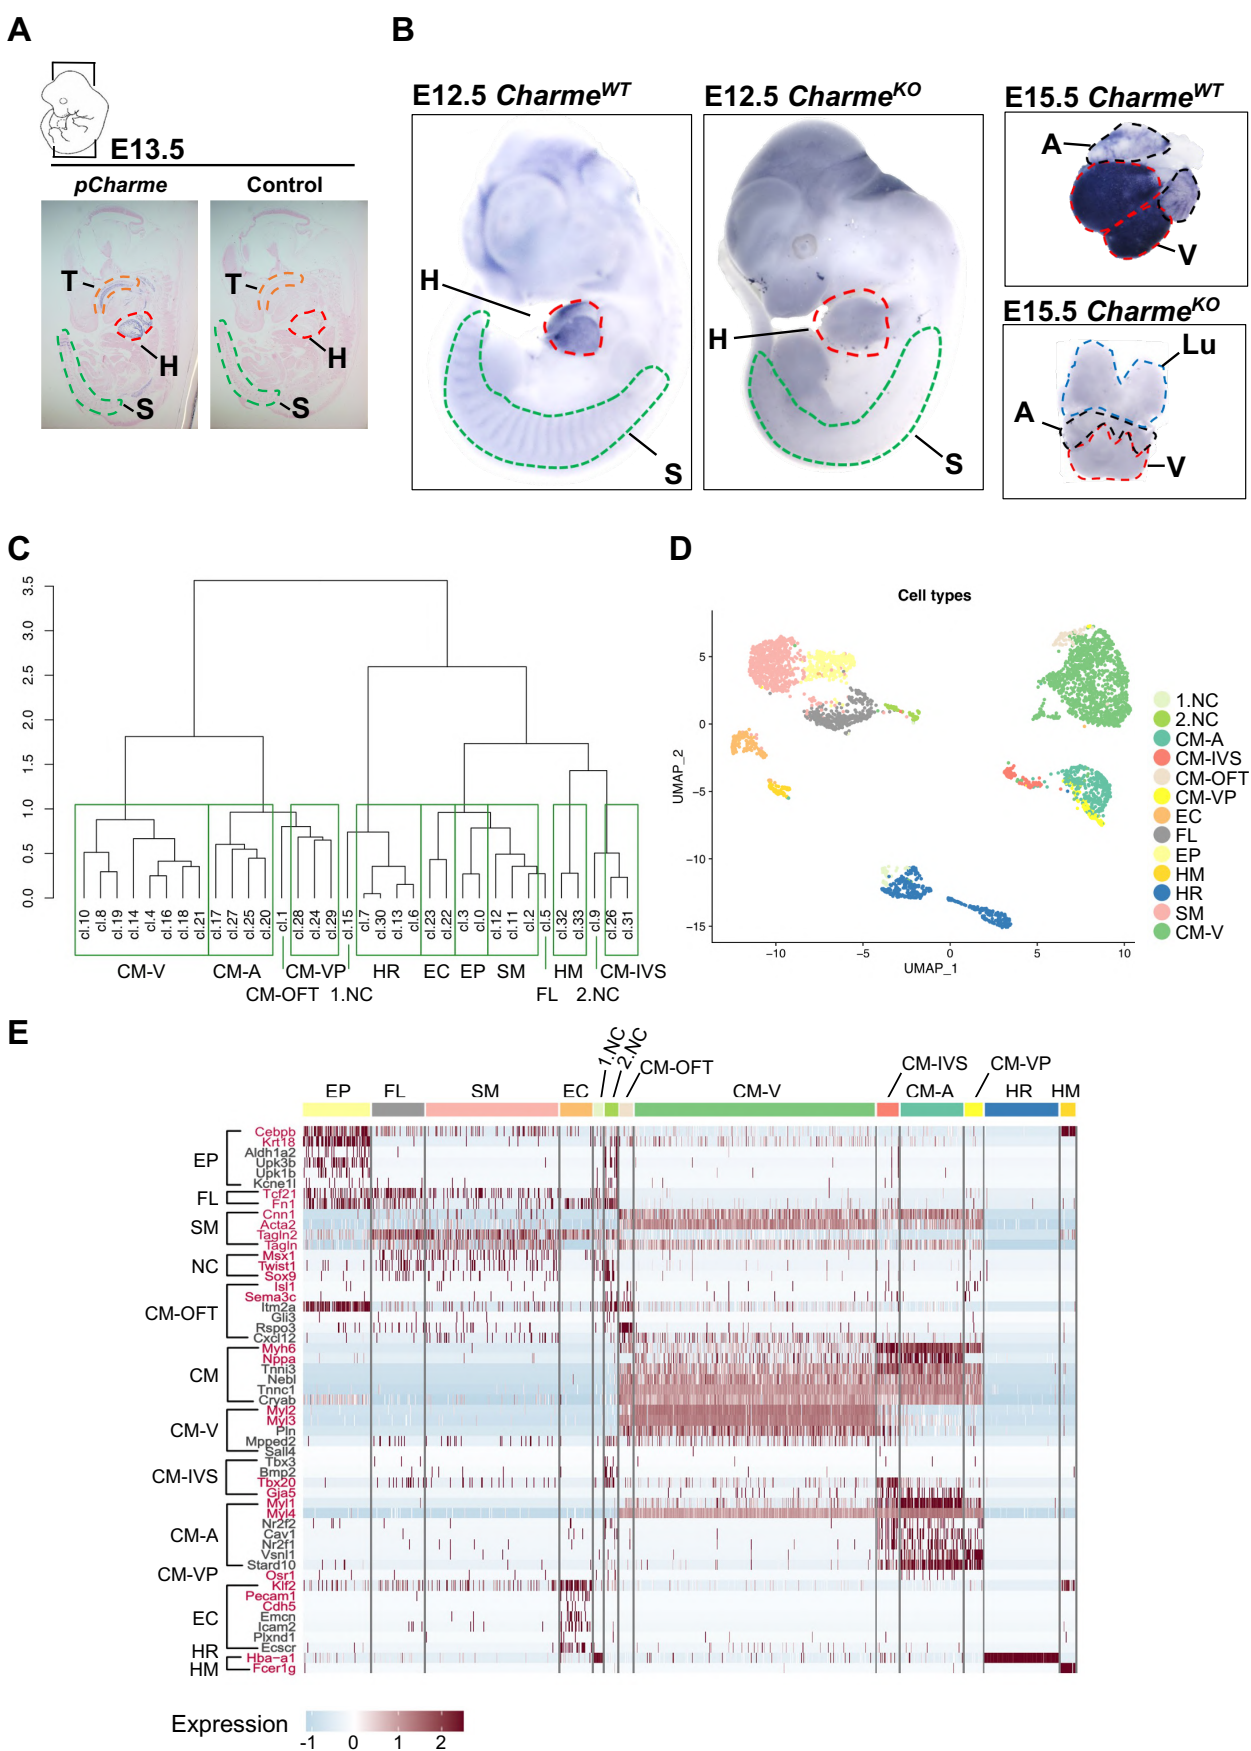

860 **Figure 1-figure supplement 1**

861 **A)** *In-situ* hybridization (ISH) performed on E13.5 embryonic cryo-sections using digoxigenin-  
862 labelled RNA antisense (*pCharme*, left panel) or sense (control, right panel) probes against *pCharme*.  
863 T: Tongue; H: Heart; S: Somites. **B)** Whole-mount *in-situ* hybridization (WISH) performed on  
864 *Charme*<sup>WT</sup> and *Charme*<sup>KO</sup> intact embryos (E12.5, left panels) and hearts (E15.5, right panels). Signal  
865 is specifically detected in heart (H, red line) and somites (S, green line). The specificity of the staining  
866 can be appreciated by the complete absence of signal in *Charme*<sup>KO</sup> samples. **C)** Dendrogram showing  
867 the relationships between homogeneous clusters. It was obtained using 1 - cosine similarity between  
868 clusters computed on the COTAN correlation values for each gene in each cluster. All the informative  
869 transcriptome was used to create a hierarchical clustering between homogeneous cell clusters. Green  
870 boxes mark which clusters were merged for the final clustering (**Figure 1-figure supplement 1D** and  
871 **S1E**). CM: Cardiomyocytes, A-CM: Atrial-CM, V-CM: Ventricular-CM, ISV: Interventricular  
872 Septum, VP: Venous Pole, OFT: Outflow Tract, NC: Neural Crest cell, EP: Epicardial cells, FL:  
873 Fibroblasts like cells, ED: Endothelial Cells, SM: Smooth Muscle cells, HM: Hemopoietic Myeloid  
874 cells, HR: Hemopoietic Red blood cells. **D)** Seurat ([Stuart et al., 2019](#)) UMAP plot coloured by final  
875 cell assignments. See **Materials and Methods** for details. **E)** Heatmap was generated by the Seurat  
876 DoHeatmap function ([Stuart et al., 2019](#)) and represents the log normalized expression of cell identity  
877 markers (listed on the left) for each cell of the identified sub-populations. Genes used for cell cluster  
878 assignment are marked in red. In the heatmap red represents the maximum expression value, light  
879 blue the minimum. Correspondence between gene markers and cell types is indicated on the left.

## Figure 2-figure supplement 1

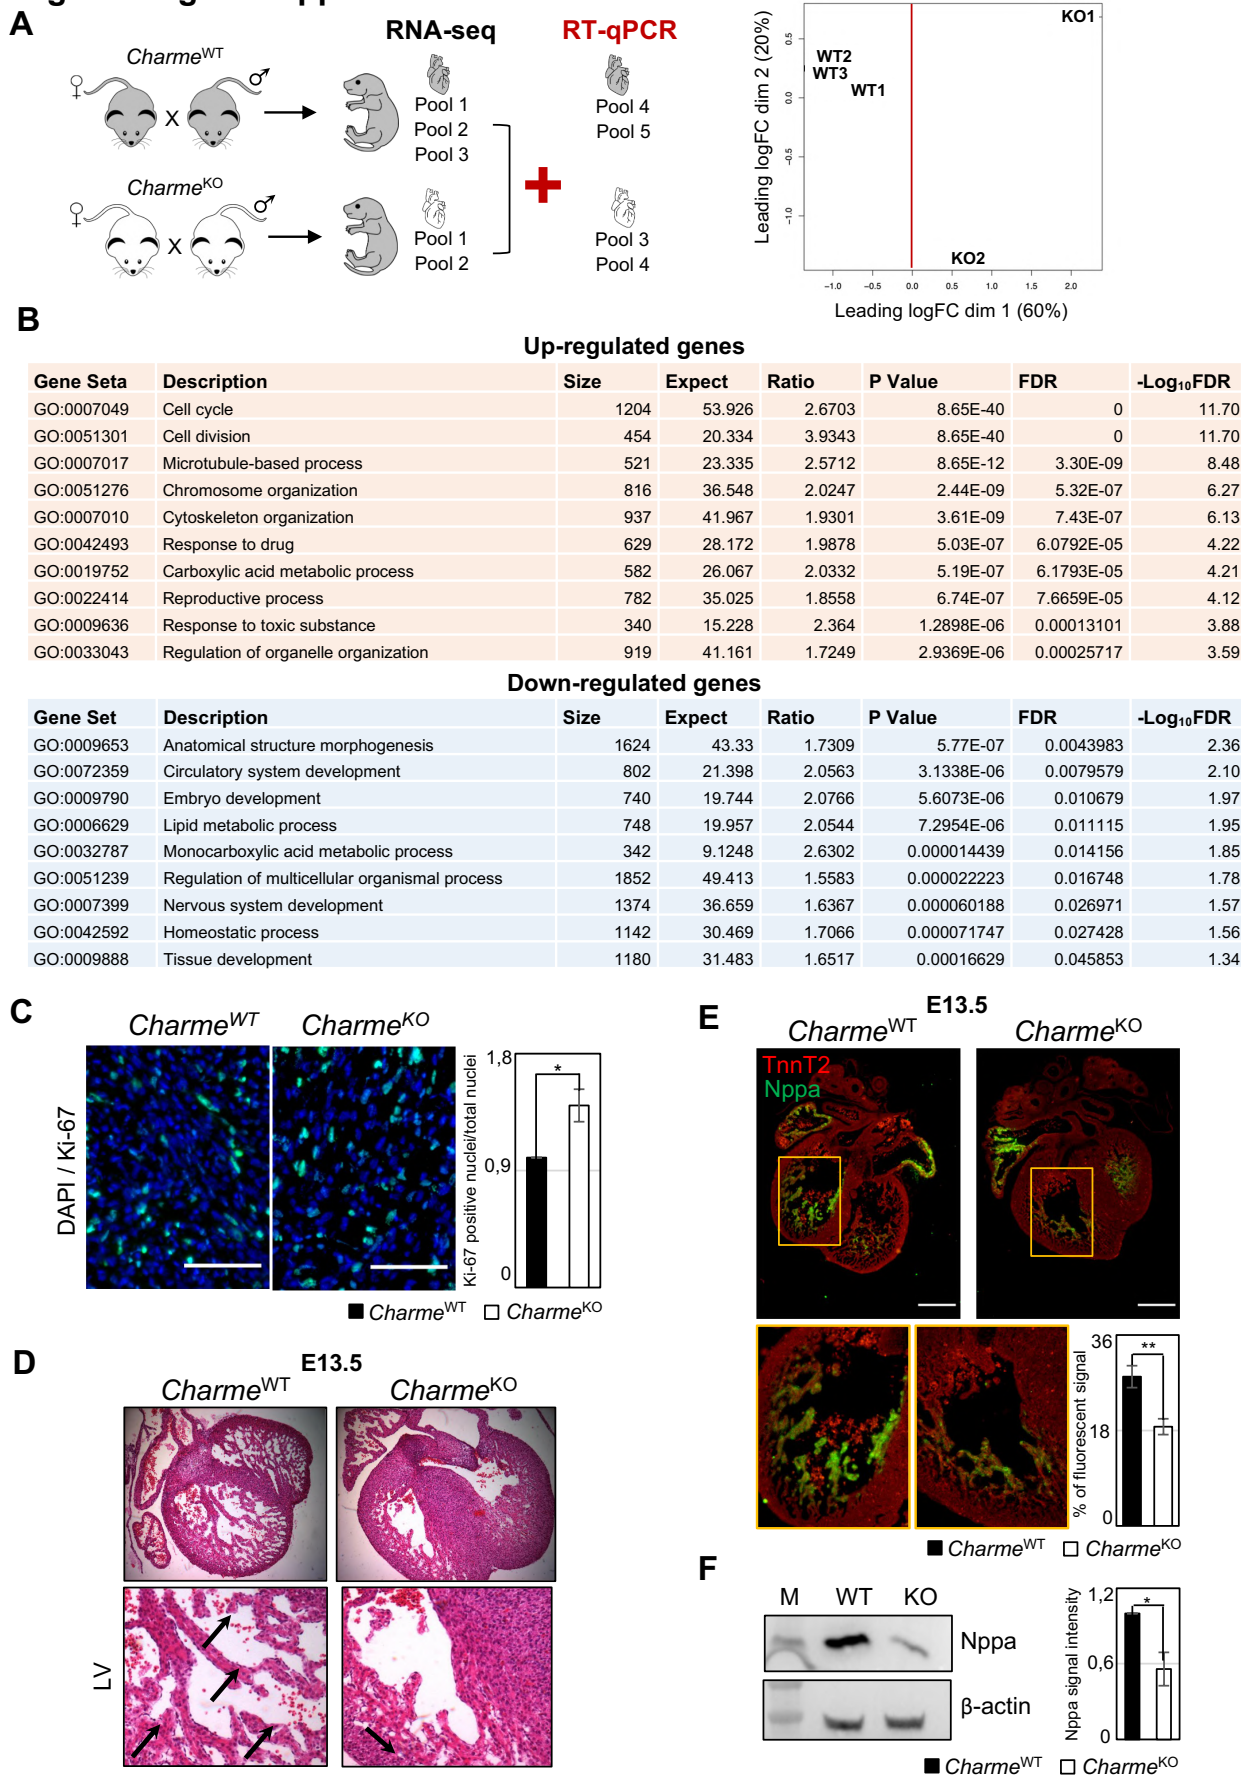



G

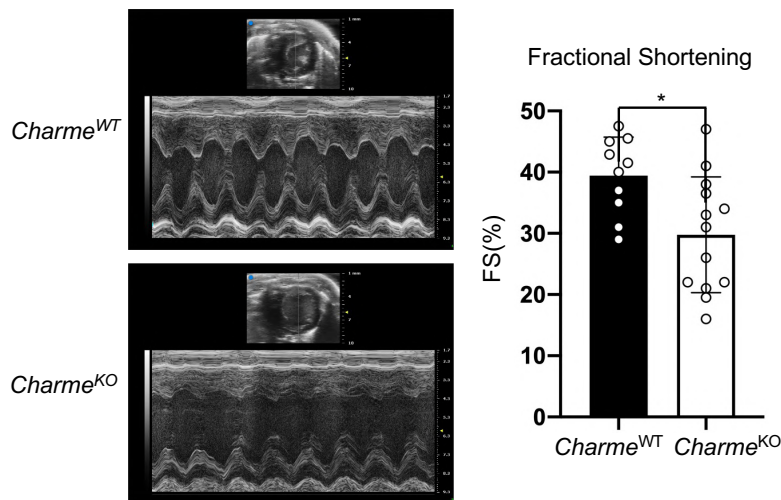

881

882 **Figure 2-figure supplement 1**

883 **A)** Left panel: schematic overview of the workflow used to identify DEGs from *Charme*<sup>WT</sup> and  
 884 *Charme*<sup>KO</sup> cardiac transcriptomes. Right panel: multi-dimensional scaling plot of leading fold-change  
 885 between each pair of *Charme*<sup>WT</sup> and *Charme*<sup>KO</sup> RNA-seq samples. Plot was obtained by using the  
 886 plotMDS function from edgeR package  
 887 ([https://www.bioconductor.org/packages/release/bioc/vignettes/edgeR/inst/doc/edgeRUsersGuide.p](https://www.bioconductor.org/packages/release/bioc/vignettes/edgeR/inst/doc/edgeRUsersGuide.pdf)  
 888 [df](https://www.bioconductor.org/packages/release/bioc/vignettes/edgeR/inst/doc/edgeRUsersGuide.pdf)). **B)** Table reports the over-represented GO categories of biological processes in decreasing order  
 889 of  $-\text{Log}_{10}\text{FDR}$  as identified by WebGestalt (<http://www.webgestalt.org>). All the represented  
 890 categories show a FDR value  $<0.05$ . **C)** Left panel: Representative image from immunostaining for  
 891 Ki-67 (green) and DAPI (blue) on *Charme*<sup>WT</sup> and *Charme*<sup>KO</sup> (PN) cardiac sections. Data are mean  $\pm$   
 892 SEM.; n = 4. Each image is representative of three individual samples. Scale bars: 70  $\mu\text{m}$ ; Right  
 893 panel: quantification of Ki-67 positive nuclei/total nuclei on *Charme*<sup>WT</sup> and *Charme*<sup>KO</sup> heart sections  
 894 from postnatal mice. Data are mean  $\pm$  SEM.; n = 4. Each image is representative of four individual  
 895 samples. **D)** Haematoxylin eosin staining from *Charme*<sup>WT</sup> and *Charme*<sup>KO</sup> E13.5 hearts transverse  
 896 sections (upper panels) and their magnifications (lower panels). Black arrows indicate trabeculated  
 897 myocardium. Scale bars, 50  $\mu\text{m}$ . **E)** Representative images from immunostaining for Nppa (green)  
 898 and TnnT2 (red) in *Charme*<sup>WT</sup> and *Charme*<sup>KO</sup> (E13.5) cardiac sections. Scale bar: 300  $\mu\text{m}$ .  
 899 Quantification of the area covered by Nppa fluorescent signal is shown aside. Data represent the mean  
 900 (%)  $\pm$  SEM of at least 6 images from biological replicates for each genotype. **F)** Left panel:  
 901 Representative image from western blot analysis for Nppa in *Charme*<sup>WT</sup> and *Charme*<sup>KO</sup> E15.5 hearts  
 902 extract.  $\beta$ -actin was used as a loading control. Right panel: Quantification of Nppa signal intensity  
 903 relative to  $\beta$ -actin. Data are mean  $\pm$  SEM (n = 3). **G)** Representative M-mode echocardiographic track  
 904 of *Charme*<sup>WT</sup> and *Charme*<sup>KO</sup> 9-12 months aged mice. Quantification of heart function was evaluated  
 905 by FS (Fractional Shortening) = (EDD-ESD)/EDD; EDD= end-diastolic diameter and ESD= end-  
 906 systolic diameter. Data are mean  $\pm$  SEM (n = 10-13). Data information: \*p < 0.05, \*\*p < 0.01, \*\*\*p  
 907 < 0.001, unpaired Student's t test.

908

### Figure 3-figure supplement 1

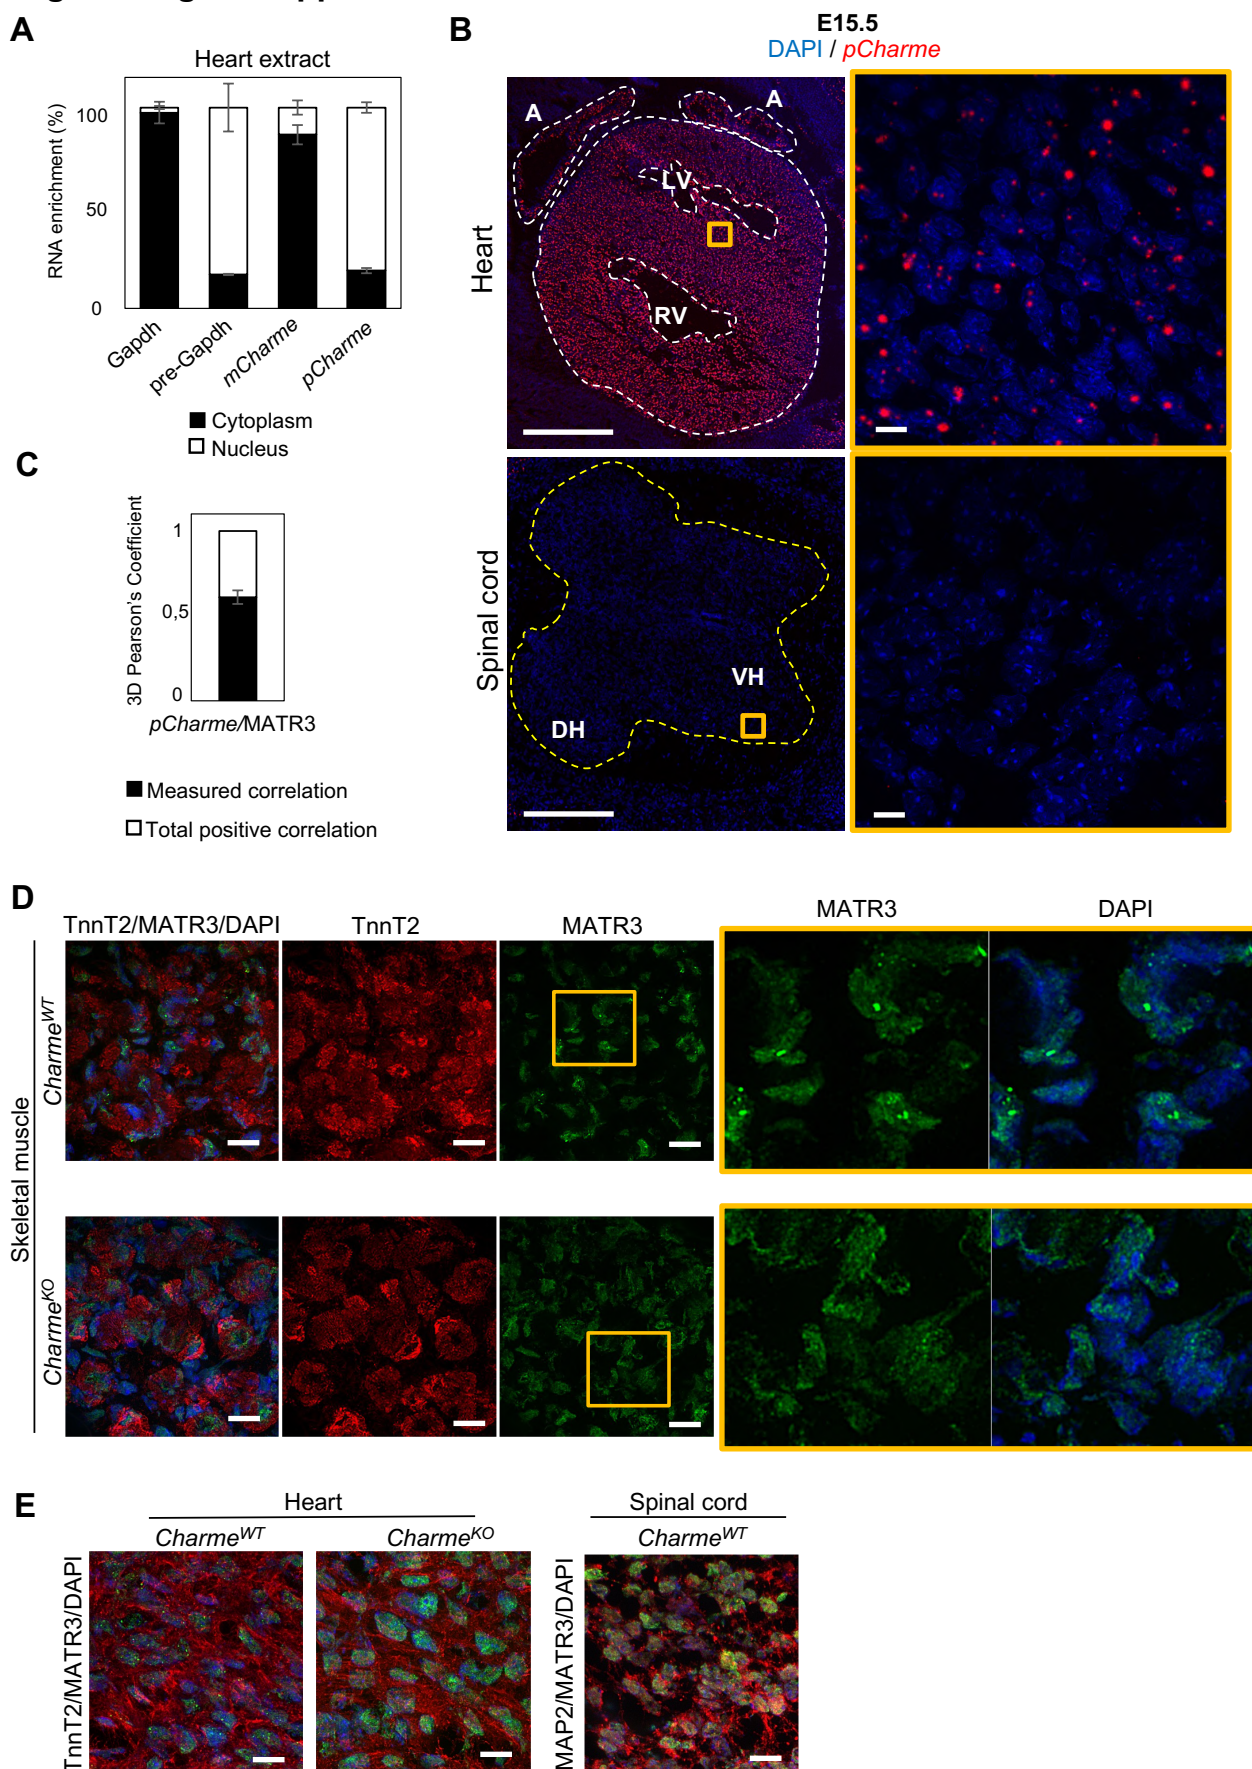



910 **Figure 3-figure supplement 1**

911 **A)** Left panel: Quantification of the subcellular distribution of *pCharme* and *mCharme* in cardiac  
912 tissues from PN mice. Histogram shows the RT-qPCR quantification of the relative % of RNA  
913 abundance in cytoplasmic *versus* nuclear compartments. GAPDH and pre-GAPDH RNAs were used,  
914 respectively, as cytoplasmic and nuclear controls. **B)** RNA-FISH for *pCharme* (red) and DAPI  
915 staining (blue) in *Charme*<sup>WT</sup> hearts and spinal cord from E15.5 embryos sections (left panels) and  
916 their magnification (right panels). Signal is specifically detected in whole heart (white dashed line)  
917 while no signal is detected in spinal cord (yellow dashed line). A: Atria; LV and RV: Left and Right  
918 ventricle; DH and VH: Dorsal and Ventral horn. Scale bars, 500  $\mu$ m; 10  $\mu$ m for magnifications. **C)**  
919 3D Pearson's correlation coefficient of *pCharme*/MATR3 overlapping signals. Histogram indicates  
920 the mean  $\pm$ SEM calculated over 237 colocalized signals inside the nuclei from 3 independent  
921 experiments. **D)** Immunostaining for MATR3 (green), TnnT2 (red) and DAPI (blue) in *Charme*<sup>WT</sup>  
922 and *Charme*<sup>KO</sup> skeletal muscles from E15.5 embryos cryosections. The selected regions of interest  
923 (orange squares) were digitally enlarged on the right panels. Each image is a representative of three  
924 individual samples. Scale bars, 10  $\mu$ m. **E)** Left panel: Immunostaining for MATR3 (green), TnnT2  
925 (red) and DAPI (blue) in *Charme*<sup>WT</sup> and *Charme*<sup>KO</sup> heart from E15.5 embryos. Right panel:  
926 Immunostaining for MATR3 (green), Map2 (red) and DAPI (blue) in *Charme*<sup>WT</sup> and *Charme*<sup>KO</sup>  
927 spinal cord from E15.5 embryos. Each image is representative of three individual samples. Scale bars,  
928 10  $\mu$ m.

929

930

## Figure 4-figure supplement 1

**A**

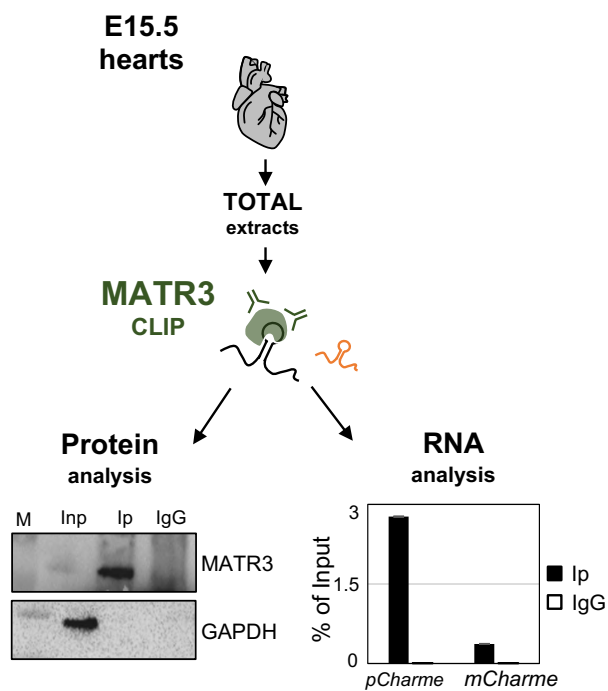

**B**

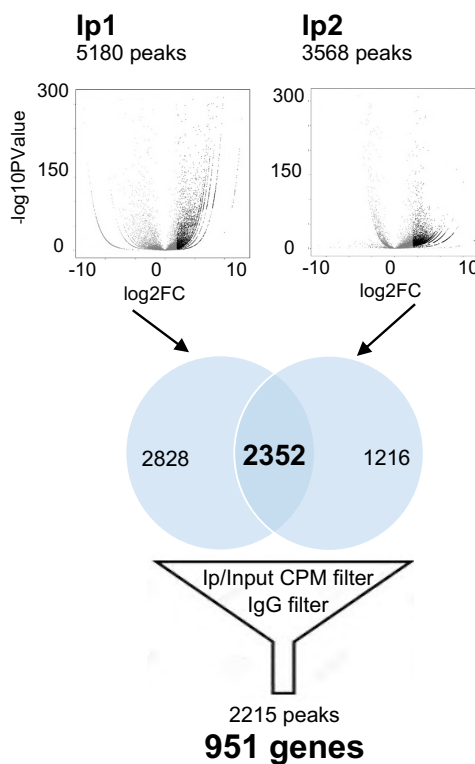

**C**

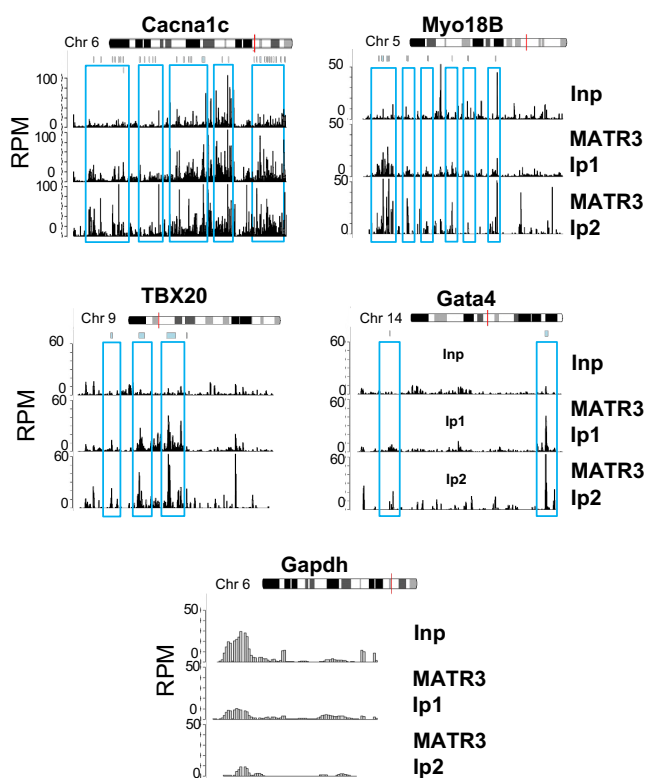

**D**

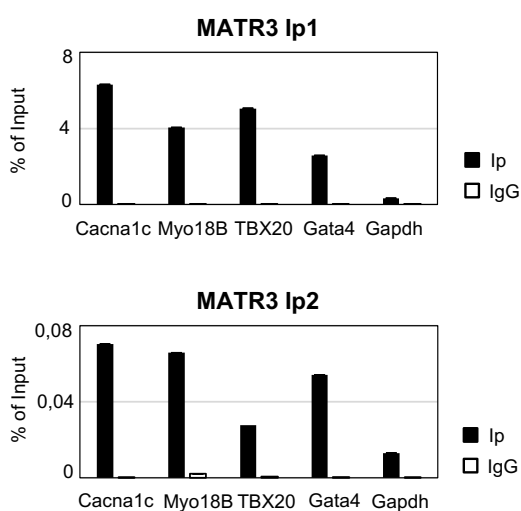

931

932

933 **Figure 4-figure supplement 1**

934 **A)** Schematic representation of MATR3-CLIP assay performed on total extracts from embryonal  
935 hearts. Left panel: representative image of western blot analysis performed to test MATR3 recovery  
936 in the Ip and IgG samples. GAPDH protein serves as a loading control. Right panel: RT-qPCR  
937 quantification of *pCharme* and *mCharme* transcripts recovery in the Ip and IgG samples. Values are  
938 expressed as percentage (%) of Input. **B)** Schematic representation of the workflow of MATR3 CLIP-  
939 seq analysis: the Volcano plots represent the fold-enrichment over Input ( $\log_2$  fold-enrichment, x-  
940 axis) and significance ( $-\log_{10}$  PValue, y-axis) of MATR3 peaks in Ip1 sample (left panel) and Ip2  
941 sample (right panel). Each dot represents a peak and the black dots represent significantly enriched  
942 peaks ( $\log_2$  Fold enrichment  $> 2$  and FDR  $< 0.05$ ). The Venn diagrams depict the intersection of  
943 significantly enriched peaks identified in Ip1 and Ip2 that, after filters applying, correspond to 951  
944 common MATR3-bound transcripts. See **Materials and Methods** for details. **C)** Genomic  
945 visualization of Input (Inp), Ip1 and Ip2 normalized read coverage tracks (RPM) from MATR3 CLIP-  
946 seq on *Cacna1c*, *Myo18B*, *TBX20*, *Gata4* and *GAPDH* loci. MATR3 peaks displaying  $\log_2$  Fold  
947 enrichment  $> 2$  in both Ip1 and Ip2 samples compared to Input are depicted as light blue squares and  
948 are demarcated by light blue boxes. Plot obtained using Gviz R package. **D)** RT-qPCR quantification  
949 of *Cacna1c*, *Myo18B*, *TBX20* and *Gata4* transcripts recovery in Ip1 (upper panel), Ip2 (lower panel)  
950 and IgG samples. GAPDH transcript serves as negative control. Values are expressed as percentage  
951 (%) of Input.

952

953 **REFERENCES**

954 Akerberg BN, Gu F, VanDusen NJ, Zhang X, Dong R, Li K, Zhang B, Zhou B, Sethi I, Ma Q, et al. 2019. A  
955 reference map of murine cardiac transcription factor chromatin occupancy identifies dynamic and conserved  
956 enhancers. *Nat Commun* **10**: 4907.

957 Ajima R, Akazawa H, Kodama M, Takeshita F, Otsuka A, Kohno T, Komuro I, Ochiya T, Yokota J. 2008.  
958 Deficiency of *Myo18B* in mice results in embryonic lethality with cardiac myofibrillar aberrations. *Genes*  
959 *Cells* **13**:987-99.

960

961 Anders S, Pyl PT, Huber W. 2015. HTSeq--a Python framework to work with high-throughput sequencing  
962 data. *Bioinformatics* **31**:166-169.

963 Anderson K, Anderson D, McAnally J, Shelton JM, Bassel-Duby R, Olson EN. 2016. Transcription of the  
964 non-coding RNA upperhand controls *Hand2* expression and heart development. *Nature* **539**: 433–436.

965 Anderson DM, Anderson KM, Nelson BR, McAnally JR, Bezprozvannaya S, Shelton JM, Bassel-Duby R, &  
966 Olson EN. 2021. A myocardin-adjacent lncRNA balances SRF-dependent gene transcription in the heart.  
967 *Genes & development* **35**: 835–840.

968 Ang YS, Rivas RN, Ribeiro A, Srivas R, Rivera J, Stone NR, Pratt K, Mohamed T, Fu JD, Spencer CI, et al.  
969 2016. Disease Model of GATA4 Mutation Reveals Transcription Factor Cooperativity in Human  
970 Cardiogenesis. *Cell* **167**: 1734–1749.

971 Aydin B, Kakumanu A, Rossillo M, Moreno-Estellés M, Garipler G, Ringstad N, Flames N, Mahony S, &  
972 Mazzoni EO. 2019. Proneural factors *Ascl1* and *Neurog2* contribute to neuronal subtype identities by  
973 establishing distinct chromatin landscapes. *Nature Neuroscience* **22**: 897.

974 Azad FM, Polignano LI, Proserpio V, Oliviero S. 2021. Long Noncoding RNAs in Human Stemness and  
975 Differentiation. *Trends in Cell Biology* **31**: 542-545.

- 976 Ballarino M, Cazzella V, D'Andrea D, Grassi L, Bisceglie L, Cipriano A, Santini T, Pinnarò C, Morlando M,  
977 Tramontano A, Bozzoni I. 2015. Novel Long Noncoding RNAs (lncRNAs) in Myogenesis: a miR-31  
978 Overlapping lncRNA Transcript Controls Myoblast Differentiation. *Molecular and Cellular Biology*, **35**: 728–  
979 736.
- 980 Ballarino M, Cipriano A, Tita R, Santini T, Desideri F, Morlando M, Colantoni A, Carrieri C, Nicoletti C,  
981 Musarò A, Carroll DO, Bozzoni I. 2018. Deficiency in the nuclear long noncoding RNA Charmé causes  
982 myogenic defects and heart remodeling in mice. *The EMBO Journal* **37**: e99697.
- 983 Banerjee A, Vest KE, Pavlath GK, Corbett AH. 2017. Nuclear poly(A) binding protein 1 (PABPN1) and  
984 Matrin3 interact in muscle cells and regulate RNA processing. *Nucleic Acids Research* **45**: 10706–10725.
- 985 Barnett DW, Garrison EK, Quinlan AR, Strömberg MP, Marth GT. 2011. BamTools: a C++ API and toolkit  
986 for analyzing and managing BAM files. *Bioinformatics* **27**:1691-2.
- 987 Bhat P, Honson D, Guttman M. 2021. Nuclear compartmentalization as a mechanism of quantitative control  
988 of gene expression. *Nat Rev Mol Cell Biol* **22**:653-670.
- 989 Bolger AM, Lohse M, Usadel B. 2014. Trimmomatic: A flexible trimmer for Illumina sequence data.  
990 *Bioinformatics* **30**: 2114–2120.
- 991 Bouveret R, Waardenberg AJ, Schonrock N, Ramialison M, Doan T, de Jong D, Bondue A, Kaur G, Mohamed  
992 S, Fonoudi H, et al. 2015. NKX2-5 mutations causative for congenital heart disease retain functionality and  
993 are directed to hundreds of targets. *eLife* **4**: e06942.
- 994 Bruneau BG. 2013. Signaling and transcriptional networks in heart development and regeneration. *Cold Spring*  
995 *Harbor perspectives in biology* **5**: a008292.
- 996 Buckingham M. 2017. Gene regulatory networks and cell lineages that underlie the formation of skeletal  
997 muscle. *PNAS* **114**: 5830-5837.
- 998 Buonaiuto G, Desideri F, Taliani V, Ballarino M. 2021. Muscle Regeneration and RNA: New Perspectives for  
999 Ancient Molecules. *Cells* **10**: 2512.
- 1000 Castro-Mondragon JA, Riudavets-Puig R, Rauluseviciute I, Lemma RB, Turchi L, Blanc-Mathieu R, Lucas J,  
1001 Boddie P, Khan A, Manosalva Pérez N et al. JASPAR 2022: the 9th release of the open-access database of  
1002 transcription factor binding profiles. *Nucleic Acids Res.* 2022 Jan 7;50(D1):D165-D173. doi:  
1003 10.1093/nar/gkab1113. PMID: 34850907; PMCID: PMC8728201.
- 1004 Cazzella V, Martone J, Pinnarò C, Santini T, Twayana SS, Sthandier O, D'Amico A, Ricotti V, Bertini E,  
1005 Muntoni F, Bozzoni I. 2012. Exon 45 skipping through U1-snRNA antisense molecules recovers the Dys-  
1006 nNOS pathway and muscle differentiation in human DMD myoblasts. *Mol Ther.* **20**: 2134-42.
- 1007 Center for Disease Control and Prevention, (2020, December 9). Data and Statistics on Congenital Heart  
1008 Defects. <https://www.cdc.gov/ncbddd/heartdefects/data.html>
- 1009 Cha HJ, Uyan Ö, Kai Y, Liu T, Zhu Q, Tothova Z, Botten GA, Xu J, Yuan GC, Dekker J, Orkin SH. 2021.  
1010 Inner nuclear protein Matrin-3 coordinates cell differentiation by stabilizing chromatin architecture. *Nat*  
1011 *Commun.* **12**: 6241.
- 1012 Choquet C, Kelly RG, & Miquerol L. 2019. Defects in Trabecular Development Contribute to Left Ventricular  
1013 Noncompaction. *Pediatric Cardiology* **40**: 1331–1338.
- 1014 Chu H, Kohane DS, & Langer R. 2016. RNA therapeutics - The potential treatment for myocardial infarction.  
1015 *Regenerative Therapy* **4**: 83–91.

- 1016 Cipriano A, Ballarino M. 2018. The Ever-Evolving Concept of the Gene: The Use of RNA/Protein  
1017 Experimental Techniques to Understand Genome Functions. *Front Mol Biosci* **6**: 5-20.
- 1018 Coelho MB, Attig J, Ule J, Smith CW. 2016. Matrin3: connecting gene expression with the nuclear matrix.  
1019 *Wiley Interdiscip Rev RNA* **7**: 303-15.
- 1020 D'Ambra E, Santini T, Vitiello E, D'Uva S, Silenzi V, Morlando M, Bozzoni I. 2021. Circ-Hdgfrp3 shuttles  
1021 along neurites and is trapped in aggregates formed by ALS-associated mutant FUS. *iScience* **24**: 103504.
- 1022 DeLaughter DM, Bick AG, Wakimoto H, McKean D, Gorham JM, Kathiriya IS, Hinson JT, Homsy J, Gray J,  
1023 Pu W, et al. 2016. Single-Cell Resolution of Temporal Gene Expression during Heart Development. *Dev Cell*  
1024 **39**:480-490.
- 1025 Desideri F, Cipriano A, Petrezselyova S, Buonaiuto G, Santini T, Kasperek P, Prochazka J, Janson, G, Paiardini  
1026 A, et al. 2020. Intronic Determinants Coordinate lncRNA Nuclear Activity through the Interaction  
1027 with MATR3 and PTBP1. *Cell Reports* **33**: 108548.
- 1028 de Soysa TY, Ranade SS, Okawa S, et al. 2019 Single-cell analysis of cardiogenesis reveals basis for organ-  
1029 level developmental defects. *Nature* **572**: 120-124.
- 1030 Dobin A, Davis CA, Schlesinger F, Drenkow J, Zaleski C, Jha S, Batut P, Chaisson M, Gingeras TR. 2013.  
1031 STAR: ultrafast universal RNA-seq aligner. *Bioinformatics* **29**:15-21.
- 1032 Dunn NR, Vincent SD, Oxburgh L, Robertson EJ, Bikoff EK. 2004. Combinatorial activities of Smad2 and  
1033 Smad3 regulate mesoderm formation and patterning in the mouse embryo. *Development* **131**: 1717-28.
- 1034 Franco D, Meilhac SM, Christoffels VM, Kispert A, Buckingham M, Kelly RG. 2006. Left and right  
1035 ventricular contributions to the formation of the interventricular septum in the mouse heart. *Dev Biol.* **294**:  
1036 366-375.
- 1037 Galfrè SG, Morandin F, Pietrosanto M, Cremisi F, Helmer-Citterich M. 2020. COTAN: scRNA-seq data  
1038 analysis based on gene co-expression, *NAR Genomics and Bioinformatics* **3**: lqab072.
- 1039 Ghafouri-Fard S, Abak A., Talebi SF, Shoorei H, Branicki W, Taheri M, Akbari Dilmaghani N. 2021. Role of  
1040 miRNA and lncRNAs in organ fibrosis and aging. *Biomedicine & pharmacotherapy* **143**: 112132.
- 1041 García-Padilla C, Aránega A, Franco D. 2018. The role of long non-coding RNAs in cardiac development and  
1042 disease. *AIMS Genet* **5**: 124-140.
- 1043 Goonasekera SA, Hammer K, Auger-Messier M, Bodi I, Chen X, Zhang H, Reiken S, Elrod JW, Correll RN,  
1044 York AJ, et al. 2012. Decreased cardiac L-type Ca<sup>2+</sup> channel activity induces hypertrophy and heart failure in  
1045 mice. *J Clin Invest* **122**: 280-290.
- 1046 Grote P, Wittler L, Hendrix D, Koch F, Währisch S, Beisaw A, Macura K, Bläss G, Kellis M, Werber M, et  
1047 al. 2013. The tissue-specific lncRNA Fendrr is an essential regulator of heart and body wall development in  
1048 the mouse. *Dev Cell* **24**:206-214.
- 1049 Hahne F, Ivanek R. 2016. Visualizing Genomic Data Using Gviz and Bioconductor. *Methods Mol Biol* **18**:  
1050 335-51.
- 1051 Hall JM, Kainth AS, Rowton MJ, Lu E, Haddad G, Keplinger AJ, Šćepanović J, Perez-Cervantes S, Chan  
1052 SSK, Piccirilli JA, et al. 2021. The cardiac lncRNA Chantico directly regulates *Cxcl1* chemokine transcription.  
1053 *bioRxiv* doi: 10.1101/2021.12.23.474040.
- 1054 Han P, Li W, Lin CH, Yang J, Shang C, Nurnberg ST, Jin KK, Xu W, Lin CY, Lin CJ, et al. 2014. A long  
1055 noncoding RNA protects the heart from pathological hypertrophy. *Nature* **514**: 102–106.



- 1056 Han X, Zhang J, Liu X, Fan X, Ai S, Luo Y, Li X, Jin H, Luo S, Zheng H, et al. 2019. The lncRNA  
1057 Hand2os1/Uph locus orchestrates heart development through regulation of precise expression of Hand2.  
1058 *Development* **146**: dev176198.
- 1059 Horsthuis T, Houweling AC, Habets PE. MH, De Lange FJ, El Azzouzi H, Clout DEW, Moorman AFM,  
1060 Christoffels VM. 2008. Distinct regulation of developmental and heart disease-induced atrial natriuretic factor  
1061 expression by two separate distal sequences. *Circulation Research* **102**: 849–859.
- 1062 Hu G, Niu F, Humburg BA, Liao K, Bendi S, Callen S, Fox HS, Buch S. 2018. Molecular mechanisms of long  
1063 noncoding RNAs and their role in disease pathogenesis. *Oncotarget* **9**: 18648–18663.
- 1064 Ikeda S, Mizushima W, Sciarretta S, Abdellatif M, Zhai P, Mukai R, Fefelova N, Oka SI, Nakamura M, Del  
1065 Re DP, et al. 2019. Hippo Deficiency Leads to Cardiac Dysfunction Accompanied by Cardiomyocyte  
1066 Dedifferentiation During Pressure Overload. *Circ Res.* **124**: 292-305.
- 1067 Jackson-Weaver O, Ungvijanpunya N, Yuan Y, Qian J, Gou Y, Wu J, Shen H, Chen Y, Li M, et al. 2020.  
1068 PRMT1-p53 Pathway Controls Epicardial EMT and Invasion. *Cell Rep* **31**:107739.
- 1069 Kim NJ, Lee KH, Son Y, Nam AR, Moon EH, Pyun JH, Park J, Kang JS, Lee YJ, Cho JY. 2021.  
1070 Spatiotemporal expression of long noncoding RNA Moshe modulates heart cell lineage commitment. *RNA*  
1071 *Biol.* **18**: 640-654.
- 1072 Klattenhoff CA, Scheuermann JC, Surface LE, Bradley RK, Fields PA, Steinhauser ML, Ding H, Butty VL,  
1073 Torrey L, Haas S et al., 2013. Braveheart, a long noncoding RNA required for cardiovascular lineage  
1074 commitment. *Cell* **152**: 570–583.
- 1075 Kodo K, Nishizawa T, Furutani M, Arai S, Yamamura E, Joo K, Takahashi T, Matsuoka R, Yamagishi H.  
1076 2009. GATA6 mutations cause human cardiac outflow tract defects by disrupting semaphorin-plexin signaling.  
1077 *Proceedings of the National Academy of Sciences of the United States of America* **106**: 13933–13938.
- 1078 Latham SL, Weiß N, Schwanke K, Thiel C, Croucher DR, Zweigerdt R, Manstein DJ, Taft MH. 2020. Myosin-  
1079 18B Regulates Higher-Order Organization of the Cardiac Sarcomere through Thin Filament Cross-Linking  
1080 and Thick Filament Dynamics. *Cell Rep* **32**: 108090.
- 1081 Li G, Xu A, Sim S, Priest JR, Tian X, Khan T, Quertermous T, Zhou B, Tsao PS, Quake SR, et al. 2016.  
1082 Transcriptomic Profiling Maps Anatomically Patterned Subpopulations among Single Embryonic Cardiac  
1083 Cells. *Dev Cell* **39**:491-507.
- 1084 Li H, Handsaker B, Wysoker A, Fennell T, Ruan J, Homer N, Marth G, Abecasis G, Durbin R. 2009.1000  
1085 Genome Project Data Processing Subgroup. The Sequence Alignment/Map format and SAMtools.  
1086 *Bioinformatics* **25**: 2078-2079.
- 1087 Liao Y, Wang J, Jaehnig EJ, Shi Z, Zhang B. 2019. WebGestalt 2019: gene set analysis toolkit with revamped  
1088 UIs and APIs. *Nucleic Acids Res.* **47**:W199-W205.
- 1089 Luna-Zurita L, Stirnimann CU, Glatt S, Kaynak BL, Thomas S, Baudin F, Samee MAH, He D, Small EM,  
1090 Mileikovsky M, et al. 2016. Complex Interdependence Regulates Heterotypic Transcription Factor  
1091 Distribution and Coordinates Cardiogenesis. *Cell* **164**: 999–1014.
- 1092 MacGrogan D, Münch J, de la Pompa JL. 2018. Notch and interacting signalling pathways in cardiac  
1093 development, disease, and regeneration. *Nat Rev Cardiol.* **15**: 685-704.
- 1094 Martin M. 2011. Cutadapt removes adapter sequences from high-throughput sequencing reads.  
1095 *EMBnet.journal* **17**: 10-12.
- 1096 Mattick J. 2004. RNA regulation: a new genetics?. *Nat Rev Genet* **5**: 316–323.



- 1097 Meilhac SM, Buckingham ME. 2018. The deployment of cell lineages that form the mammalian heart. *Nat*  
1098 *Rev Cardiol* **15**:705-724.
- 1099 Morton SU, Quiat D, Seidman, JG, Seidman C E. 2022. Genomic frontiers in congenital heart disease. *Nature*  
1100 *reviews. Cardiology* **19**: 26–42.
- 1101 Moorman AF, Christoffels VM. 2003. Cardiac chamber formation: development, genes, and evolution. *Physiol*  
1102 *Rev* **83**: 1223-67.
- 1103 Nadadur RD, Broman MT, Boukens B, Mazurek SR, Yang X, van den Boogaard M, Bekeny J, Gadek M,  
1104 Ward T, Zhang M, et al. 2016. Pitx2 modulates a Tbx5-dependent gene regulatory network to maintain atrial  
1105 rhythm. *Science translational medicine* **8**: 354ra115.
- 1106 Noguchi S, Arakawa T, Fukuda S, Furuno M, Hasegawa A, Hori F, Ishikawa-Kato S, Kaida K, Kaiho A,  
1107 Kanamori-Katayama M, et al. 2017. FANTOM5 CAGE profiles of human and mouse samples. *Scientific Data*  
1108 **4**: 1–10.
- 1109 Olson E. 1993. Regulation of muscle transcription by the MyoD family. The heart of the matter. *Circulation*  
1110 *research* **72**: 1-6.
- 1111 Ounzain S, Micheletti R, Arnan C, Plaisance I, Cecchi D, Schroen B, Reverter F, Alexanian M, Gonzales C,  
1112 Ng, SY, Bussotti G et al., 2015. CARMEN, a human super enhancer-associated long noncoding RNA  
1113 controlling cardiac specification, differentiation and homeostasis. *Journal of molecular and cellular*  
1114 *cardiology* **89**: 98–112.
- 1115 Pagano F, Calicchio A, Picchio V, Ballarino M. 2020. The Noncoding Side of Cardiac Differentiation and  
1116 Regeneration. *Current Stem Cell Research & Therapy* **15**: 723–738.
- 1117 Pinheiro A, Naya FJ. 2021. The Key Lnc (RNA)s in Cardiac and Skeletal Muscle Development, Regeneration,  
1118 and Disease. *Journal of Cardiovascular Development and Disease* **8**: 84.
- 1119 Ponnusamy M, Liu F, Zhang YH, Li RB, Zhai M, Liu F, Zhou LY, Liu CY, Yan KW, Dong YH, et al. 2019.  
1120 Long Noncoding RNA CPR (Cardiomyocyte Proliferation Regulator) Regulates Cardiomyocyte Proliferation  
1121 and Cardiac Repair. *Circulation* **139**: 2668–2684.
- 1122 Quinlan AR, Hall IM. 2010. BEDTools: a flexible suite of utilities for comparing genomic features.  
1123 *Bioinformatics* **26**: 841-842.
- 1124 Quintero-Rivera F, Xi QJ, Keppler-Noreuil KM, Lee JH, Higgins AW, Anchan RM, Roberts AE, Seong IS,  
1125 Fan X, Lage K, et al. 2015. MATR3 disruption in human and mouse associated with bicuspid aortic valve,  
1126 aortic coarctation and patent ductus arteriosus. *Human molecular genetics* **24**: 2375–2389.
- 1127 Ramírez F, Dünder F, Diehl S, Grüning BA, Manke T. 2014. deepTools: a flexible platform for exploring  
1128 deep-sequencing data. *Nucleic Acids Res* **42**: W187-91.
- 1129 Ribeiro DM, Zanzoni A, Cipriano A, Delli Ponti R, Spinelli L, Ballarino M, Bozzoni I, Tartaglia GG, Brun C.  
1130 2018. Protein complex scaffolding predicted as a prevalent function of long non-coding RNAs. *Nucleic Acids*  
1131 *Research* **46**: 917–928.
- 1132 Rinn JL, Chang HY. 2012. Genome regulation by long noncoding RNAs. *Annual review of biochemistry* **81**:  
1133 145–166.
- 1134 Ritter N, Ali T, Kopitchinski N, Schuster P, Beisaw A, Hendrix DA, Schulz MH, Müller-McNicoll M,  
1135 Dimmeler S, Grote P. 2019. The lncRNA Locus Handsdown Regulates Cardiac Gene Programs and Is  
1136 Essential for Early Mouse Development. *Dev Cell*. **50**:644-657.

- 1137 Riva P, Ratti A, Venturin M. 2016. The Long Non-Coding RNAs in Neurodegenerative Diseases: Novel  
1138 Mechanisms of Pathogenesis. *Current Alzheimer research* **13**: 1219–1231.
- 1139 Robinson MD, McCarthy DJ, Smyth GK. 2010. edgeR: a Bioconductor package for differential expression  
1140 analysis of digital gene expression data. *Bioinformatics* **26**:139-40.
- 1141 Roden C, Gladfelter AS. 2021. RNA contributions to the form and function of biomolecular condensates. *Nat*  
1142 *Rev Mol Cell Biol* **22**:183-195.
- 1143 Sabour D, Machado R, Pinto JP, Rohani S, Sahito R, Hescheler J, Futschik ME, Sachinidis A. 2018. Parallel  
1144 Genome-wide Profiling of Coding and Non-coding RNAs to Identify Novel Regulatory Elements in  
1145 Embryonic and Maturated Heart. *Molecular therapy. Nucleic acids* **12**: 158–173.  
1146
- 1147 Samsa LA, Yang B, & Liu J. 2013. Embryonic cardiac chamber maturation: Trabeculation, conduction, and  
1148 cardiomyocyte proliferation. *American Journal of Medical Genetics, Part C: Seminars in Medical Genetics*  
1149 **163**: 157–168.  
1150
- 1151 Scheuermann JC, Boyer LA. 2013. Getting to the heart of the matter: long non-coding RNAs in cardiac  
1152 development and disease. *EMBO J* **32**: 1805-16.  
1153
- 1154 Srivastava D. 2006. Genetic regulation of cardiogenesis and congenital heart disease. *Annual review of*  
1155 *pathology* **1**: 199–213.
- 1156 Steimle JD, Moskowitz IP. 2017. TBX5: A Key Regulator of Heart Development. *Current topics in*  
1157 *developmental biology*, **122**: 195–221.
- 1158 Stuart T, Butler A, Hoffman P, Hafemeister C, Papalexi E, Mauck WM 3rd, Hao Y, Stoeckius M, Smibert P,  
1159 Satija R. 2019. Comprehensive Integration of Single-Cell Data. *Cell* **177**:1888-1902.
- 1160 Tao YK, Zeng H, Zhang GQ, Chen ST, Xie XJ, He X, Wang S, Wen H, Chen JX. 2017. Notch3 deficiency  
1161 impairs coronary microvascular maturation and reduces cardiac recovery after myocardial ischemia. *Int J*  
1162 *Cardiol* **236**:413-422.  
1163
- 1164 Uemura Y, Oshima T, Yamamoto M, Reyes CJ, Costa Cruz PH, Shibuya T, & Kawahara Y. 2017. MatrIn3  
1165 binds directly to intronic pyrimidine-rich sequences and controls alternative splicing. *Genes to cells : devoted*  
1166 *to molecular & cellular mechanisms* **22**: 785–798.
- 1167 Ulitsky I, Bartel DP. 2013. lincRNAs: genomics, evolution, and mechanisms. *Cell* **154**: 26–46.
- 1168 Uosaki H, Cahan P, Lee DI, Wang S, Miyamoto M, Fernandez L, Kass DA, Kwon C. 2015. Transcriptional  
1169 landscape of cardiomyocyte maturation. *Cell Rep* **13**:1705–1716.
- 1170 Uren PJ, Bahrami-Samani E, Burns SC, Qiao M, Karginov FV, Hodges E, Hannon GJ, Sanford JR, Penalva  
1171 LOF, Smith AD. 2012. Site identification in high-throughput RNA–protein interaction data. *Bioinformatics*  
1172 **28**: 3013–3020.
- 1173 van den Hoogenhof MMG, Beqqali A, Amin AS, van der Made I, Aufiero S, Khan MAF, Schumacher CA,  
1174 Jansweijer JA, van Spaendonck-Zwarts KY, Remme CA, et al. 2018. RBM20 Mutations Induce an  
1175 Arrhythmogenic Dilated Cardiomyopathy Related to Disturbed Calcium Handling. *Circulation* **138**: 1330-  
1176 1342.
- 1177 Wang K, Holt C, Lu J, Brohus M, Larsen KT, Overgaard MT, Wimmer R, Van Petegem F. 2018. Arrhythmia  
1178 mutations in calmodulin cause conformational changes that affect interactions with the cardiac voltage-gated  
1179 calcium channel. *Proc Natl Acad Sci U S A* **115**: E10556-E10565.

- 1180 Wang Y, Chen J, Cowan DB, Wang DZ. 2021. Non-coding RNAs in cardiac regeneration: Mechanism of  
1181 action and therapeutic potential. *Seminars in cell & developmental biology* **118**: 150–162.
- 1182 Wang Z, Zhang XJ, Ji YX, Zhang P, Deng KQ, Gong J, Ren S, Wang X, Chen I, Wang I, et al. 2016. The long  
1183 noncoding RNA Chaer defines an epigenetic checkpoint in cardiac hypertrophy. *Nat. Med.* **22**: 1131–1139.
- 1184 Yang XH, Nadadur RD, Hilvering CR, Bianchi V, Werner M, Mazurek SR, Gadek M, Shen KM, Goldman  
1185 JA, Tyan L et al. 2017. Transcription-factor-dependent enhancer transcription defines a gene regulatory  
1186 network for cardiac rhythm. *Elife* **6**: e31683.
- 1187 Yao RW, Wang Y, Chen LL. 2019. Cellular functions of long noncoding RNAs. *Nature cell biology* **21**: 542–  
1188 551.
- 1189 Zhao C, Li G, Li J. 2020. Non-coding RNAs and Cardiac Aging. *Advances in experimental medicine and*  
1190 *biology* **1229**: 247–258.
- 1191 Zhao S, Guo Y, Sheng Q, Shyr Y. 2014. Advanced heat map and clustering analysis using heatmap3. *Biomed.*  
1192 *Res. Int* e986048.
- 1193 Zimmerman MS, Carswell Smith AG, Sable CA, Echko MM, Wilner LB, Olsen HE, Tasew Atalay H, Awasthi  
1194 A, Bhutta ZA, Boucher JL, et al. 2020. Global, regional, and national burden of congenital heart disease, 1990–  
1195 2017: a systematic analysis for the Global Burden of Disease Study 2017. *The Lancet. Child & adolescent*  
1196 *health* **4**: 185–200.
